# Supplementary material for: In situ mechanical behavior of mineralized collagen fibrils in murine cortical bone is altered by aging and disuse
Source: PeerJ. 2025 Dec 8;13:e20313. doi: 10.7717/peerj.20313 (PMC12697299; doi:10.7717/peerj.20313)
Supplement: Supplemental Information 17 [file peerj-13-20313-s017.xlsx]

## Sheet: D-periodic spacing
Adult-control-0N	Adult-control-4N	Aged-control-0N	Aged-control-4N	Adult-HLU-0N	Adult-HLU-4N	Aged-HLU-0N	Aged-HLU-4N
50	50.3	80.3449	89.4557	50.1	50	78.2779	51.9211
50.1	50.3	68.867	89.4557	50.1	50.1	82.5121	83.0738
50.1	50.3	62.2684	60.0033	50.2	50.2	81.4102	72.6896
50.1	50.3	83.0245	70.0038	50.2	50.2	81.4102	83.0738
50.2	50.3	83.0245	50.0027	50.3	50.5	82.011	83.0738
50.2	50.3	79.5552	70.1825	50.3	50.5	82.011	87.2789
50.3	50.3	62.5274	59.3425	50.3	50.5	82.011	76.369
50.3	50.3	83.3699	89.0137	50.4	50.6	82.0882	87.2789
50.4	50.4	62.5274	89.0137	50.4	50.6	82.0882	87.2789
50.4	50.4	83.3019	80.3196	50.5	50.9	82.0882	89.4014
50.6	50.4	83.3019	80.1692	50.6	50.9	82.0882	78.2262
50.7	50.5	54.1673	59.0974	50.6	50.9	75.8548	55.8759
50.8	50.5	86.6676	88.6461	50.6	51	75.8548	89.4014
51	50.6	86.6676	88.7386	50.7	51.1	75.8548	55.8759
51	50.8	86.6676	88.7386	50.7	51.1	88.0231	73.8911
51	50.9	65.0007	88.7386	50.8	51.2	88.0231	84.447
51.1	51	75.8342	61.3256	50.8	51.2	88.0231	52.7794
51.1	51	86.6676	51.1046	50.8	51.3	88.0231	52.7794
51.1	51	86.6676	51.1046	50.8	51.5	81.8996	84.447
51.1	51	86.6676	51.1046	50.8	51.6	81.8996	84.447
51.1	51.1	75.8342	60.3107	50.9	51.6	79.7541	79.9078
51.1	51.1	86.6676	80.1819	51.1	51.6	79.7541	89.8963
51.2	51.1	81.8665	80.1819	51.1	51.6	58.9011	59.9308
51.2	51.2	81.8665	69.954	51.1	51.7	78.5348	89.8963
51.2	51.2	59.533	89.9409	51.3	51.9	78.5348	79.9078
51.4	51.2	74.6826	88.9084	51.3	51.9	58.9011	82.3841
51.4	51.3	85.3515	69.6839	51.3	51.9	78.6321	82.3841
51.4	51.4	85.3515	69.6839	51.3	52	78.6321	72.0861
51.4	51.4	74.6826	89.5936	51.4	52	79.3576	61.7881
51.4	51.5	74.6826	59.7291	51.4	52.2	79.5161	77.655
51.6	51.5	85.3515	88.6193	51.5	52.3	81.1368	55.4679
51.8	51.7	74.6826	73.1024	51.5	52.4	60.8526	66.5614
51.8	51.8	64.0136	85.1446	51.6	52.4	83.1686	83.6008
51.8	51.8	65.8902	85.1446	51.6	52.6	85.8949	73.1507
51.8	52	76.8719	72.9811	51.7	52.6	61.3535	62.7006
52.2	52.1	87.8536	71.1587	51.7	52.8	61.3535	70.0682
52.2	52.2	54.9085	71.5462	51.7	52.8	61.3535	80.078
52.3	52.2	65.0007	89.0098	51.7	53	71.1851	89.7395
52.3	52.3	86.6676	89.0098	51.7	53	59.3209	69.7974
52.3	52.3	86.6676	79.1198	51.7	53.2	71.1851	80.4904
52.3	52.3	86.4437	72.3761	51.8	53.3	71.1851	72.1981
52.3	52.4	86.4437	80.1874	51.8	53.4	67.0613	61.8841
52.6	52.4	86.4437	59.123	52	53.4	80.4735	51.5701
52.6	52.5	75.6382	88.6844	52	53.4	53.649	82.5121
52.7	52.5	83.1998	88.6844	52	53.4	67.0613	61.2792
52.8	52.5	76.6278	88.6844	52	53.4	83.0262	85.7909
52.8	52.8	65.6809	68.9768	52.1	53.4	69.1885	61.2792
52.8	52.8	69.7696	70.8136	52.1	53.5	69.1885	61.2792
52.9	52.8	89.7037	80.9299	52.1	53.5	80.8804	73.535
53	52.8	89.7037	50.313	52.2	53.7	59.5812	61.2792
53	52.8	79.7366	72.1981	52.2	53.7	79.4417	73.535
53	53	86.0575	82.5121	52.2	53.8	89.3719	61.2792
53	53	64.5431	82.5121	52.2	54	69.9049	85.7909
53.1	53	78.2779	51.5701	52.3	54	64.9618	73.535
53.2	53	88.5757	83.3854	52.3	54.1	75.7887	73.535
53.5	53.1	88.5757	52.1159	52.6	54.1	54.1348	78.8871
53.5	53.2	88.5757	72.9622	52.6	54.1	72.4982	67.6175
53.8	53.5	88.5757	51.9124	52.7	54.2	82.8551	67.6175
53.8	53.6	68.8922	83.0598	52.9	54.2	82.8551	78.8871
53.9	53.6	89.0098	83.0598	52.9	54.3	82.8551	78.8871
54.3	53.6	89.0098	60.3048	53.1	54.3	62.1413	78.8871
54.4	54	79.1198	80.4064	53.1	54.3	62.1413	78.8871
54.5	54	89.0098	63.4317	53.2	54.7	89.8735	56.3479
54.7	54.1	59.3398	88.8044	53.2	54.7	67.8189	70.5313
54.7	54.1	80.687	76.118	53.2	54.7	67.8189	80.6072
54.7	54.4	89.3539	88.8044	53.3	54.7	54.2551	80.6072
54.7	54.4	80.5452	88.8044	53.3	54.7	78.9043	80.6072
55	54.5	89.3417	50.7454	53.4	54.7	88.7673	50.3795
55	54.5	79.4148	88.8044	53.4	54.7	78.9043	50.3795
55	54.5	89.3417	76.118	53.5	54.8	88.7673	50.3795
55.1	54.5	89.3417	76.118	53.6	54.8	78.9043	80.6072
55.1	54.7	89.0987	62.2187	53.8	54.9	69.0412	80.6072
55.1	54.7	89.0987	87.1061	53.8	55	73.8456	70.5313
55.2	54.9	70.8251	74.6624	54.1	55	63.2962	50.3795
55.4	54.9	80.943	74.6624	54.1	55.1	84.3949	80.6072
55.4	54.9	89.8066	50.48	54.3	55.6	52.7468	86.3794
55.4	54.9	89.8066	70.6721	54.3	55.8	84.3949	61.6996
55.7	54.9	80.7445	50.48	54.3	55.9	73.8456	61.6996
56	55	88.0825	60.5761	54.4	55.9	88.6627	74.0395
56	55	88.0825	70.6721	54.4	56.3	66.4971	61.6996
56	55	88.0825	50.48	54.4	56.4	87.3322	86.3794
56	55.1	78.2956	60.5761	54.4	56.4	62.3801	86.3794
56	55.1	75.9749	80.7681	54.4	56.6	74.8561	86.3794
56	55.1	86.8285	89.1316	54.4	56.6	87.3322	74.0395
56	55.3	86.8285	89.1316	54.6	56.6	62.3801	74.0395
56.5	55.4	86.8285	89.1316	54.6	56.8	88.0876	61.6996
56.6	55.4	86.8285	89.1316	54.7	56.8	78.3001	69.9744
56.8	55.7	75.9749	89.1316	54.7	57	88.0876	89.967
56.8	55.7	75.9749	66.8487	54.7	57	66.1314	59.978
56.9	55.7	88.1024	85.4894	54.7	57.4	55.1095	79.9707
56.9	55.9	78.3133	72.4509	54.9	57.9	88.1752	89.967
57.1	56.4	88.1024	89.5008	54.9	57.9	59.0261	69.9744
57.2	56.4	88.1024	89.5008	55	57.9	59.0261	79.9707
57.7	56.8	78.3133	78.3132	55	57.9	87.714	89.967
57.7	56.8	68.5241	89.5008	55	57.9	62.6529	59.978
58.1	56.8	88.2555	89.5008	55.4	58	75.1834	60.4221
58.3	57.6	88.2555	65.638	55.4	58.2	75.1834	72.5065
58.6	57.6	88.7653	87.5173	55.4	58.2	75.1834	60.4221
58.7	57.6	88.7653	69.8861	55.4	58.2	56.9187	60.4221
58.7	57.6	89.1827	89.8536	56	58.7	56.9187	60.4221
58.7	57.6	89.1827	89.8536	56	58.7	56.9187	60.4221
58.7	57.7	88.8776	79.9029	56.1	58.7	56.9187	72.662
58.7	57.7	88.8776	79.9029	56.2	58.7	88.9257	83.0422
58.7	57.7	88.8776	89.8908	56.3	58.7	79.0451	62.2817
58.7	57.9	88.8776	89.8908	56.8	58.7	59.2838	83.0422
58.8	57.9	88.2487	69.9151	56.8	58.7	62.4965	83.0422
58.8	58	88.2487	68.675	56.8	58.7	87.495	53.9887
58.8	58.2	88.2487	88.2964	56.8	58.7	62.4965	75.5842
58.8	58.2	88.2487	78.4857	57.6	58.7	74.9958	86.382
58.8	58.4	88.2487	88.2964	57.6	58.7	60.1366	53.9887
58.8	58.4	88.9291	61.5991	57.7	58.7	70.1594	64.7865
58.8	58.4	88.9291	51.3326	57.7	58.7	60.1366	75.5842
58.8	58.5	88.9291	82.1321	57.7	58.7	70.1594	64.7865
58.8	58.5	89.1395	76.0189	57.8	58.8	65.9323	74.741
58.8	58.5	69.3307	76.0189	57.8	58.8	87.9098	87.1978
58.8	58.5	80.3594	86.8787	57.9	58.8	81.3075	87.1978
58.8	58.7	79.5825	88.7312	58.2	58.8	81.3075	74.741
58.8	58.7	89.5303	70.967	58.4	58.8	81.0462	59.719
58.8	58.7	89.5303	87.9908	58.4	58.8	81.0462	83.6065
58.8	58.7	88.0957	87.9908	58.7	59.1	60.9989	83.6065
58.8	58.7	88.5622	87.9908	58.7	59.6	81.3319	82.1478
58.8	58.7	88.5622	87.9908	58.7	59.6	60.9989	58.677
58.8	58.7	70.6514	87.9908	58.7	59.6	60.5153	82.1478
58.8	58.7	80.7445	50.2804	58.7	59.6	80.687	87.714
58.8	58.7	71.5089	87.9908	58.7	59.6	80.687	87.714
58.9	58.7	81.7245	75.4206	58.7	59.6	79.2623	62.6529
59	58.7	81.835	65.978	58.7	59.6	79.2623	85.972
59	58.7	81.835	76.9744	58.7	59.6	79.2735	85.972
59.1	58.7	81.9418	76.9744	58.7	59.6	79.2735	73.6903
59.1	58.7	81.9418	60.3857	58.7	59.6	79.2735	79.1915
59.1	58.7	88.5067	80.5143	58.7	59.6	79.2735	89.0904
59.1	58.7	88.5067	81.1737	58.7	59.7	80.9859	89.3131
59.2	58.7	88.5067	81.1737	58.7	59.7	80.9859	89.3131
59.2	58.7	88.5067	60.8802	58.7	59.8	60.7394	69.4657
59.2	58.7	88.5067	82.232	58.7	59.8	80.9859	89.3328
59.3	58.7	88.5067	82.232	58.7	59.8	80.9859	79.4069
59.3	58.7	89.0183	59.924	58.7	59.8	83.7199	79.4069
59.3	58.7	89.0183	89.886	58.7	59.8	83.7199	59.2786
59.3	58.8	89.8066	79.8986	58.7	60	83.7199	69.1583
59.4	58.8	89.8066	69.9113	58.7	60	80.8533	88.9179
59.4	58.8	89.8066	59.1782	58.7	60	80.8533	88.9179
59.4	58.8	89.8066	59.1782	58.7	60	80.8533	88.9179
59.5	58.8	88.5107	88.7673	58.7	60.1	80.8533	88.9179
59.5	58.8	88.5107	88.7673	58.7	60.2	80.687	88.6539
59.5	58.8	88.5107	68.9845	58.7	60.2	80.687	88.6539
59.5	58.8	89.9534	78.8395	58.7	60.2	81.2689	88.6539
59.5	58.8	79.9586	88.6944	58.7	60.2	81.2689	88.1043
59.5	58.8	69.9638	88.6944	58.7	60.2	60.9517	68.5256
59.6	58.8	79.5749	88.6944	58.7	60.3	81.2689	66.605
59.6	58.8	89.5218	83.9887	58.7	60.4	81.2689	66.605
59.6	58.8	79.5749	83.9887	58.7	60.4	59.1653	79.9259
59.7	58.9	81.1368	56.1978	58.7	60.5	78.8871	66.605
59.7	58.9	81.1368	67.4373	58.7	60.5	59.1653	66.605
59.7	58.9	79.4148	67.4373	58.7	60.6	78.8871	79.9259
59.7	58.9	89.3417	89.9164	58.8	60.6	79.7782	53.284
59.7	58.9	89.3417	82.6691	58.8	60.6	79.7782	79.9259
59.7	58.9	89.7583	82.6691	58.8	60.8	59.8336	66.605
59.7	58.9	79.7852	82.6691	58.8	60.8	80.4434	79.9259
59.7	58.9	50.2597	60.6805	58.8	60.8	89.213	79.9259
59.7	58.9	80.4156	60.6805	58.8	60.8	79.3004	66.605
59.7	58.9	50.2597	50.5671	58.8	60.9	89.3757	53.284
59.7	58.9	70.3636	60.6805	58.8	60.9	79.4451	70.7956
59.7	58.9	70.3636	60.6805	58.8	60.9	58.7168	82.5949
59.7	58.9	50.7313	60.6805	58.8	60.9	58.7168	82.5949
59.7	58.9	50.7313	50.5671	58.8	60.9	63.2309	70.7956
59.7	59	68.9476	50.5671	58.8	60.9	69.6982	82.5949
59.7	59.1	78.7972	84.1328	58.8	60.9	69.6982	67.16
59.7	59.1	88.6469	73.6162	58.8	61.1	59.7413	67.16
59.8	59.1	78.6056	84.1328	58.8	61.1	79.6551	78.3534
59.8	59.1	88.4313	84.1328	58.8	61.1	89.612	67.16
59.8	59.2	88.4313	78.3261	58.9	61.1	50.9761	78.3534
59.8	59.2	88.1412	88.1168	58.9	61.1	68.7139	67.16
59.8	59.2	58.7608	78.3261	58.9	61.1	58.8977	59.925
59.8	59.3	68.6763	71.1893	58.9	61.1	58.8977	71.91
59.8	59.3	69.177	50.8495	58.9	61.2	58.8977	71.91
59.8	59.3	88.9419	71.1893	58.9	61.2	58.8977	59.925
59.8	59.4	69.177	88.1764	58.9	61.2	68.7139	83.8949
59.8	59.4	88.9419	88.1764	58.9	61.2	58.7084	89.5484
59.9	59.4	69.177	78.379	58.9	61.3	88.0626	79.5986
59.9	59.4	83.2926	81.2609	58.9	61.3	58.8766	89.5484
59.9	59.4	62.4695	71.1033	58.9	61.3	58.8766	89.5484
59.9	59.4	72.8811	81.2609	58.9	61.3	58.8766	79.5986
59.9	59.4	79.2228	73.3855	58.9	61.4	58.8766	89.5484
59.9	59.6	89.1256	73.3855	58.9	61.4	58.8766	69.6487
59.9	59.6	79.2228	60.2497	58.9	61.4	68.6894	82.9339
59.9	59.6	78.5136	84.3496	58.9	61.4	58.8766	72.5672
59.9	59.6	88.3278	64.3027	58.9	61.5	84.3079	82.9339
60	59.6	68.6994	64.3027	59	61.5	63.2309	82.9339
60	59.6	78.5136	51.4422	59	61.5	50.8294	82.9339
60	59.6	68.6994	51.4422	59	61.5	50.8294	72.5672
60	59.6	58.9119	72.4806	59	61.6	50.8294	62.2004
60	59.6	68.7306	82.835	59	61.8	81.327	51.8337
60	59.7	68.7306	82.835	59	61.8	60.9952	72.5672
60.1	59.7	58.9119	82.835	59	61.8	71.1611	82.9339
60.1	59.7	88.3039	51.7719	59	61.9	60.9952	62.2004
60.2	59.7	88.3039	77.4995	59	61.9	71.5951	83.6658
60.2	59.7	68.6808	85.2504	59	61.9	74.2926	83.6658
60.2	59.8	88.3039	85.2504	59	61.9	74.2926	83.6658
60.2	59.8	78.2888	63.9378	59	61.9	74.2926	77.1757
60.2	59.8	88.0748	74.5941	59.1	61.9	74.2926	77.1757
60.2	59.8	88.0748	74.5941	59.1	61.9	82.3059	77.1757
60.3	59.8	59.2024	89.3363	59.1	61.9	61.7294	77.1757
60.3	59.8	59.2024	78.1693	59.1	62	82.3059	66.1506
60.3	59.8	69.0695	55.8352	59.1	62	61.7294	50.5014
60.3	60	59.2024	81.5101	59.1	62	82.6739	80.8022
60.3	60	78.9366	71.3213	59.1	62	62.0055	80.8022
60.3	60	78.9366	88.9567	59.2	62	64.3716	80.8022
60.4	60.1	69.0695	79.0726	59.2	62.2	83.0404	70.7019
60.4	60.3	78.9706	69.1885	59.3	62.4	60.7045	80.8022
60.4	60.3	78.9706	88.9567	59.3	62.4	80.9393	80.8022
60.4	60.3	78.9706	79.0726	59.3	62.4	72.8563	80.8022
60.4	60.3	80.1498	60.3637	59.3	62.4	72.8563	83.6755
60.4	60.3	80.1498	60.3637	59.3	62.6	72.8563	83.6755
60.5	60.3	80.1498	80.4849	59.3	62.6	89.0789	83.6755
60.5	60.3	80.1498	50.303	59.4	62.6	66.8092	83.6755
60.5	60.3	78.6158	80.9181	59.4	62.6	62.3402	83.6755
60.5	60.4	78.6158	82.3548	59.4	62.6	51.9502	69.0993
60.5	60.4	86.8099	61.7661	59.4	62.6	51.9502	88.8419
60.5	60.4	86.8099	59.8389	59.4	62.6	78.9839	88.8419
60.5	60.4	80.6961	89.7583	59.4	62.8	81.3525	88.8419
60.5	60.4	83.9494	89.7583	59.4	62.8	61.0144	78.9706
60.6	60.4	83.9494	89.7583	59.5	62.8	81.3149	78.2866
60.6	60.5	83.9494	89.7583	59.5	62.9	60.9862	88.0724
60.6	60.5	71.5089	58.8099	59.5	63	81.3149	78.2866
60.7	60.5	81.7245	88.2148	59.6	63	81.3149	68.5008
60.7	60.5	71.5089	81.0374	59.6	63	58.8693	58.715
60.8	60.6	81.6101	81.0374	59.6	63	78.4924	86.3033
60.8	60.6	83.2132	70.9077	59.6	63	56.3479	75.5154
60.8	60.6	83.2132	88.2792	59.6	63	67.6175	86.3033
60.8	60.6	83.2132	78.4704	59.7	63	78.8871	75.5154
60.8	60.7	82.7537	88.2792	59.7	63.2	89.1654	78.3638
60.9	60.7	82.7537	68.6616	59.7	63.4	89.1654	68.5684
60.9	60.7	82.7537	63.0764	59.7	63.4	78.0197	88.1593
60.9	60.7	52.0807	52.5636	59.8	63.6	59.9917	78.3638
60.9	60.7	83.3291	63.0764	59.8	63.6	56.1597	88.1593
61	60.7	51.1674	73.5891	59.8	63.6	78.6236	68.5684
61	60.7	51.1674	84.1018	59.9	63.8	67.3917	88.1593
61	60.8	69.2646	84.1018	60	63.8	89.8556	88.1593
61	60.8	59.3696	84.1018	60	63.9	89.8556	58.7729
61	60.8	89.0545	51.4061	60.1	63.9	83.5031	75.6982
61	60.8	80.2193	71.9686	60.1	63.9	83.5031	64.8842
61	60.8	80.8548	51.4061	60.1	63.9	76.5777	75.6982
61.1	60.9	80.8548	82.2498	60.1	63.9	87.5173	54.0701
61.1	61	74.0029	51.4061	60.1	64	65.638	64.8842
61.2	61	84.5747	78.5383	60.2	64	83.6774	80.5007
61.2	61	62.9138	73.9789	60.2	64	83.6774	70.4381
61.2	61	50.3311	84.5473	60.2	64.1	85.8057	80.5007
61.2	61	88.0794	88.2457	60.3	64.1	85.8057	70.4381
61.2	61.1	50.3311	68.6355	60.3	64.1	85.8057	80.5007
61.2	61.1	83.9494	61.0234	60.3	64.1	53.6285	57.3817
61.2	61.2	73.4557	81.3645	60.3	64.1	73.9789	80.3343
61.2	61.2	85.6164	81.3645	60.3	64.3	62.7006	68.858
61.2	61.2	73.3855	50.8528	60.3	64.3	62.7006	80.3343
61.2	61.2	73.3855	87.5173	60.3	64.4	62.7006	80.3343
61.2	61.2	85.6164	54.6983	60.4	64.4	52.2505	57.3817
61.2	61.2	85.6164	87.5173	60.4	64.4	83.6008	69.9376
61.2	61.2	78.9771	65.638	60.5	64.5	85.9458	89.9197
61.3	61.2	56.4122	65.638	60.5	64.6	85.9458	89.9197
61.3	61.3	58.8511	80.5007	60.6	64.6	85.9458	89.9197
61.3	61.3	88.2767	60.3755	60.6	64.6	75.2026	69.9376
61.3	61.3	58.8511	50.313	60.6	64.6	64.4363	79.9287
61.3	61.3	88.3516	70.6491	60.7	64.6	64.4363	59.9465
61.3	61.3	52.8067	60.5564	60.7	64.9	67.9669	53.5074
61.3	61.3	63.3681	60.5564	60.7	64.9	67.9669	80.2612
61.4	61.3	63.3681	88.7801	60.7	64.9	62.1543	66.8843
61.4	61.3	60.3496	88.7801	60.8	64.9	62.1543	80.2612
61.5	61.6	60.3496	88.7801	60.8	64.9	74.5851	66.8843
61.5	61.6	70.4078	78.9156	60.8	64.9	87.016	53.5074
61.5	61.6	60.3496	89.1132	60.9	64.9	87.016	76.5148
61.5	61.8	81.9871	89.1132	61	65	74.5851	51.0099
61.5	61.8	61.4904	69.3103	61	65	62.1543	89.2673
61.5	61.8	51.242	59.4088	61	65	87.016	76.5148
61.5	61.8	61.4904	59.4088	61	65	74.5851	51.0099
61.5	61.8	67.6175	79.2118	61	65	62.1543	76.5148
61.5	61.8	78.8871	70.6904	61	65	54.4574	80.2612
61.5	61.8	51.6432	70.6904	61	65.1	65.3489	80.2612
61.7	61.9	82.6291	60.5917	61.2	65.1	89.1654	80.2612
61.7	61.9	61.9718	58.9339	61.6	65.1	89.1654	80.2612
61.7	61.9	61.9718	88.4008	61.6	65.1	66.874	66.8843
61.7	62	63.8531	89.3292	61.8	65.2	89.1654	80.2612
61.7	62	51.0825	77.3235	61.8	65.2	81.5395	78.777
61.7	62	63.8531	77.3235	61.8	65.2	81.5395	78.777
61.7	62	51.0825	64.4363	61.8	65.2	81.5395	67.5231
61.9	62	74.1596	77.3235	61.8	65.3	78.4977	78.777
61.9	62	74.1596	83.0262	61.8	65.3	78.4977	67.5231
62	62	84.7538	83.0262	62	65.5	78.4977	78.4882
62	62	89.9096	83.0262	62	65.5	78.4977	78.4882
62	62	89.9096	85.3913	62	65.6	78.4977	52.3255
62	62	89.9096	74.7174	62	65.6	79.1059	65.4068
62.1	62.1	60.5153	74.7174	62	65.6	58.2723	78.4882
62.1	62.1	50.4294	64.0435	62	65.6	69.9267	78.4882
62.1	62.1	82.2918	74.7174	62	65.6	81.5812	78.4882
62.1	62.1	69.1645	73.5403	62	65.6	53.649	78.4882
62.5	62.1	88.9257	73.5403	62.1	65.8	53.649	65.4068
62.5	62.1	59.2838	73.5403	62.1	65.8	85.8384	88.221
62.7	62.1	70.8033	73.5403	62.1	65.9	53.649	88.221
62.7	62.1	80.9181	73.5403	62.2	66	85.8384	80.9872
62.7	62.1	80.9181	61.2836	62.2	66	89.3845	69.4176
62.8	62.1	88.7773	80.2636	62.4	66	89.3845	80.9872
62.8	62.2	78.9132	50.1647	62.4	66	89.3845	80.9872
62.8	62.2	88.0626	70.2306	62.4	66	61.1783	80.9872
63.1	62.2	88.0626	50.1647	62.5	66	71.3747	80.9872
63.2	62.2	78.2779	84.8822	62.5	66	81.571	80.9872
63.2	62.2	68.4931	78.2779	62.5	66	81.571	85.0491
63.2	62.3	68.9146	88.0626	62.5	66	71.3747	85.0491
63.3	62.3	88.6046	84.5249	62.5	66	69.2407	72.8992
63.3	62.3	89.0478	73.9593	62.5	66	69.2407	85.0491
63.3	62.3	89.0478	84.5249	62.5	66.1	59.3492	72.8992
63.4	62.3	88.3841	73.9593	62.5	66.1	59.3492	72.8992
63.4	62.3	78.5637	80.6145	62.5	66.1	79.1322	65.319
63.5	62.3	58.9227	50.6333	62.6	66.1	59.3492	54.1777
63.5	62.3	58.9227	70.8866	62.6	66.1	69.2407	81.2666
63.6	62.3	58.9227	81.0133	62.6	66.1	89.0238	61.8141
63.6	62.4	78.5637	81.0133	62.6	66.1	70.0639	72.1165
63.6	62.4	88.3841	89.2074	62.6	66.7	80.073	82.4189
63.6	62.4	88.3841	89.2074	62.6	66.7	50.0456	61.8141
63.6	62.4	78.2878	89.2074	62.6	66.7	80.073	83.0598
63.6	62.4	78.3537	89.2074	62.6	66.7	50.0456	83.0598
63.6	62.6	88.1479	89.7395	62.6	66.7	50.6907	82.0882
63.6	62.6	88.1479	89.7395	62.6	66.7	70.967	82.0882
63.7	62.6	88.1479	83.6008	62.6	67.1	81.1052	61.5662
63.7	62.6	78.3537	79.4397	62.6	67.1	81.1052	59.4207
63.9	62.6	88.1479	89.3697	62.6	67.1	70.967	79.2277
63.9	62.6	78.3537	79.4397	62.6	67.1	70.967	80.8244
63.9	62.6	58.7653	59.5798	62.7	67.1	68.5639	80.8244
63.9	62.6	88.287	79.4397	62.7	67.1	88.1535	80.8244
63.9	62.6	78.4773	89.3697	62.7	67.1	88.1535	80.8244
63.9	62.6	78.4773	89.3697	62.7	67.1	88.7834	79.9357
64.2	62.6	88.287	79.4397	62.7	67.1	69.0537	79.9357
64.4	62.6	68.5041	88.5018	62.7	67.1	68.5018	67.7781
64.4	62.6	88.0767	88.5018	62.7	67.1	88.0737	67.7781
64.4	62.6	68.5041	78.6683	62.8	67.5	50.1171	76.2404
64.5	62.6	78.5368	88.5018	62.8	67.6	60.1405	87.1318
64.6	62.7	78.5368	88.5018	62.8	67.6	50.1171	65.3489
64.6	62.7	68.7197	80.7809	62.8	67.6	70.164	74.289
64.6	62.7	78.6369	80.7809	62.9	67.7	80.1874	59.1849
64.6	62.7	78.6369	80.7809	62.9	67.7	50.1171	58.7433
64.6	62.8	68.8073	60.5857	62.9	67.7	80.1874	88.115
64.8	62.8	78.6369	89.8066	62.9	67.7	50.1171	83.2575
64.8	62.8	78.305	88.9318	62.9	67.7	80.1874	52.0359
64.8	62.8	88.0931	88.0704	62.9	67.7	50.0664	80.687
64.8	62.8	88.0986	68.4992	63	68.2	80.1062	70.6011
64.9	62.8	88.0986	69.057	63	68.3	60.0797	60.5153
64.9	62.8	88.0986	78.9222	63	68.3	50.0664	51.7074
64.9	62.8	88.2648	59.1917	63	68.3	50.0664	60.0866
64.9	62.9	88.2648	80.9628	63	68.3	50.0664	60.6494
64.9	62.9	78.4576	80.9628	63	68.3	50.0664	74.585
64.9	62.9	58.8432	88.139	63	68.5	80.1062	85.2399
64.9	63	68.6504	88.139	63	68.5	70.2055	74.585
64.9	63	68.6504	88.9158	63	68.5	80.2348	85.2399
64.9	63	88.2648	89.7583	63	68.5	70.2055	83.2508
65.6	63	78.4576	89.7583	63.1	68.5	50.1468	65.253
65.6	63	78.4576	89.7583	63.1	68.5	89.2773	65.253
65.6	63	88.2648	89.7583	63.2	68.5	89.2773	73.5978
65.6	63	88.2648	59.8389	63.3	68.5	69.4379	73.5978
65.6	63.1	88.4848	75.1284	63.3	68.5	89.2773	84.1117
65.6	63.1	58.9899	85.861	63.3	68.5	69.4379	82.5075
65.6	63.1	88.1065	75.1284	63.3	68.5	58.9262	61.6179
65.6	63.1	88.1065	85.861	63.3	68.5	88.3892	82.1572
65.6	63.2	59.498	85.861	63.3	68.5	88.6221	82.1572
65.6	63.2	69.4143	75.1284	63.4	68.5	88.6221	71.8876
65.6	63.2	89.247	75.1284	63.4	68.5	70.45	51.3483
65.8	63.2	88.3228	88.0986	63.5	68.5	50.3214	87.9422
65.8	63.2	78.5091	88.0986	63.5	68.5	70.45	87.9422
65.8	63.4	70.7113	51.3326	63.5	68.5	80.5143	87.9422
65.8	63.4	50.5081	51.3326	63.5	68.5	78.582	64.1216
65.9	63.4	60.6097	61.5991	63.5	68.5	68.7593	89.781
65.9	63.4	68.7369	81.2018	63.5	68.5	88.4048	79.8053
66.2	63.5	59.052	71.0515	63.5	68.5	78.582	89.781
66.2	63.5	59.052	88.2952	63.5	68.5	68.5787	87.6461
66.2	63.5	68.894	68.674	63.5	68.5	88.1726	65.7346
66.2	63.5	88.5781	88.2952	63.5	68.5	89.2416	87.6461
66.2	63.5	59.052	81.0323	63.6	68.5	69.4101	65.7346
66.3	63.5	68.894	81.0323	63.9	68.5	89.2416	54.7788
66.4	63.5	59.6152	88.5168	63.9	68.5	89.2416	88.8851
66.4	63.5	59.6152	68.8464	63.9	68.5	81.2418	88.8851
66.4	63.6	59.6152	88.2718	63.9	68.5	60.9313	87.3005
66.4	63.6	88.5353	78.4442	63.9	68.5	80.0233	87.3005
66.4	63.6	88.5353	68.6387	63.9	68.5	57.1595	65.4754
66.4	63.6	88.5353	78.4704	63.9	68.5	80.0233	54.5628
66.5	63.6	59.0235	78.4704	63.9	68.5	60.6885	85.983
66.5	63.6	59.2308	88.1593	63.9	68.5	60.6885	85.983
66.8	63.8	88.8462	88.0817	63.9	68.5	82.7016	75.2351
66.8	63.8	69.1026	89.8556	64	68.6	80.687	68.774
66.8	63.8	59.0804	89.8556	64	68.6	80.687	88.4237
66.8	63.8	72.9436	67.3917	64.2	68.6	83.1686	75.1068
66.8	63.8	52.1026	89.8556	64.2	68.6	83.1686	85.8364
66.8	63.8	78.4306	60.5688	64.3	68.6	83.1686	77.6237
66.8	63.8	88.2344	80.7583	64.3	68.6	79.3944	77.6237
66.8	63.8	88.4454	71.5951	64.4	68.6	79.3944	66.5346
66.8	64	58.8528	51.1394	64.4	68.6	69.4701	88.7129
66.8	64	88.0626	81.823	64.4	68.6	89.3187	52.46
66.8	64	69.1885	81.823	64.5	68.6	89.3187	62.952
66.9	64.1	88.9567	82.1277	64.5	68.6	89.3187	73.444
66.9	64.1	69.1885	82.1277	64.5	68.7	69.4701	61.7768
66.9	64.1	88.9567	72.1981	64.5	68.7	72.9226	88.7752
66.9	64.2	59.3045	72.1981	64.5	68.7	72.9226	79.7203
66.9	64.2	59.3045	61.8841	64.6	68.7	62.5051	54.1335
67.2	64.2	88.4911	61.8841	64.6	68.8	83.3401	86.6137
67.2	64.3	88.4911	61.8841	64.9	68.8	62.5051	86.6137
67.2	64.3	82.3841	61.8841	64.9	68.8	62.5051	68.7289
67.3	64.3	61.7881	78.3666	64.9	68.8	72.9226	72.0844
67.3	64.3	88.3799	58.9705	64.9	68.9	83.3401	51.0249
67.3	64.3	58.92	88.3014	64.9	68.9	60.4785	76.2994
67.3	64.3	58.92	88.3014	64.9	68.9	80.638	76.2994
67.3	64.3	58.92	83.4743	65.2	68.9	80.638	86.5472
67.3	64.3	88.3799	83.4743	65.3	69.1	86.382	75.7288
67.3	64.4	68.5061	89.9568	65.3	69.1	64.7865	70.7125
67.3	64.5	60.3496	89.9568	65.3	69.1	86.382	82.4979
67.6	64.5	80.4849	89.9568	65.4	69.1	68.7632	70.7125
67.7	64.5	70.4243	78.7122	65.6	69.1	61.5817	58.9271
67.7	64.6	88.1412	67.4676	65.6	69.1	82.1089	58.9271
67.7	64.6	58.7608	78.7122	65.6	69.1	81.8996	66.3174
67.7	64.6	50.4023	78.7122	65.6	69.1	81.8996	77.3703
67.7	64.6	70.5632	86.6999	65.6	69.1	78.3065	77.3703
67.7	64.9	80.6436	86.6999	65.6	69.1	88.0948	71.6611
67.7	65	69.6713	54.1874	65.6	69.2	80.9628	59.7176
67.9	65	69.3417	86.6999	65.8	69.2	60.7221	89.2972
68	65	88.8569	80.0101	65.8	69.2	60.7221	78.1351
68	65	88.8569	89.1927	65.8	69.2	82.3548	78.1351
68	65	62.09	70.395	66	69.2	70.7371	66.9729
68	65.2	88.6765	60.3386	66	69.2	80.8424	81.1022
68.1	65.2	88.6765	50.2822	66.4	69.2	73.5716	69.5162
68.2	65.3	88.4313	60.3386	66.4	69.2	63.0613	68.6473
68.3	65.3	88.4313	50.2822	66.4	69.2	73.5716	81.5915
68.3	65.3	88.4569	89.5821	67.3	69.2	84.0818	61.1936
68.3	65.4	88.4569	69.675	67.5	69.2	82.6894	61.1936
68.3	65.4	88.4569	59.7214	67.5	69.2	82.6894	81.8034
68.5	65.4	88.4569	79.6286	67.5	69.2	82.6894	61.3525
68.5	65.4	71.1977	69.675	67.5	69.3	89.5303	80.4329
68.5	65.5	71.1977	89.5821	67.5	69.3	81.2885	80.4329
68.5	65.5	83.2926	70.6833	67.5	69.3	78.7921	74.2447
68.5	65.5	71.012	50.4881	67.5	69.3	67.536	84.2315
68.5	65.9	81.1566	60.5857	67.5	69.3	56.28	84.4539
68.5	65.9	81.1566	80.7809	67.5	69.3	78.7921	72.8993
68.5	65.9	81.1566	84.6542	67.8	69.4	85.8057	83.3134
68.5	66	81.1566	52.9089	67.9	69.4	75.0799	72.8993
68.5	66	72.3532	84.6542	67.9	69.4	75.0799	72.8993
68.5	66	58.7103	60.0226	67.9	69.4	85.8057	83.3134
68.5	66	88.2194	60.0226	67.9	69.5	88.0684	82.3062
68.5	66	58.813	80.0301	67.9	69.5	78.2831	89.6098
68.5	66.1	58.813	58.7229	67.9	69.5	88.0684	72.4577
68.5	66.1	79.9801	68.4931	68	69.5	88.0684	84.4301
68.5	66.1	89.9776	50.7105	68	69.5	59.4498	73.8764
68.5	66.1	88.2991	50.7105	68.1	69.5	69.3581	73.8764
68.5	66.1	84.3079	70.9947	68.1	69.5	79.2664	71.356
68.5	66.3	63.2309	88.0844	68.1	69.5	89.1746	71.356
68.5	66.3	63.2309	88.0844	68.2	69.5	69.3581	71.356
68.5	66.3	78.2798	89.0602	68.5	69.5	80.3352	68.6628
68.5	66.3	59.3991	80.3352	68.5	69.5	80.3352	88.2807
68.5	66.3	58.8148	78.3942	68.5	69.5	78.3942	68.6628
68.6	66.4	88.2223	88.1935	68.5	69.5	88.1935	68.6628
68.6	66.4	84.5122	88.1935	68.5	69.5	88.1935	78.4718
68.6	66.4	84.5122	79.0118	68.5	69.5	79.0118	88.1984
68.6	66.4	84.5122	79.0118	68.5	69.5	79.0118	68.5988
68.6	66.4	84.5122	88.8883	68.5	69.5	88.8883	81.2786
68.6	66.4	84.2487	79.0118	68.5	69.5	79.0118	69.6673
68.6	66.4	84.2487	69.1353	68.5	69.5	69.1353	79.6982
68.6	66.4	73.7176	51.0144	68.5	69.5	51.0144	68.3127
68.6	66.4	63.1865	60.5153	68.5	69.5	60.5153	79.6982
68.6	66.4	63.1865	70.1075	68.5	69.5	70.1075	68.3127
68.6	66.5	73.7176	80.1229	68.5	69.6	80.1229	54.4049
68.6	66.5	81.3319	70.2933	68.5	69.6	70.2933	54.4049
68.6	66.5	84.1715	60.2514	68.5	69.6	60.2514	89.1827
68.6	66.5	84.1715	60.2514	68.5	69.6	60.2514	79.2735
68.6	66.5	84.1715	50.2095	68.5	69.6	50.2095	54.5186
68.6	66.5	72.147	80.3352	68.5	69.6	80.3352	83.0262
68.6	66.5	84.1715	70.2933	68.5	69.6	70.2933	69.1885
68.6	66.5	54.3714	80.3352	68.5	69.6	80.3352	89.0682
68.6	66.5	81.5571	50.6658	68.5	69.6	50.6658	89.0682
68.6	66.6	54.3714	81.0653	68.5	69.6	81.0653	55.6676
68.7	66.6	89.2773	81.0653	68.5	69.6	81.0653	66.8012
68.7	66.6	79.3576	81.0653	68.5	69.6	81.0653	77.9347
68.7	66.6	69.4379	80.3569	68.5	69.6	80.3569	89.0682
68.7	66.8	70.9607	80.3569	68.5	69.6	80.3569	89.0682
68.7	66.8	81.098	60.2677	68.5	69.6	60.2677	66.8012
68.7	66.8	83.2211	80.3569	68.5	69.6	80.3569	88.885
68.7	66.8	83.2211	70.3123	68.5	69.7	70.3123	88.5146
68.7	66.9	71.3324	60.2677	68.5	69.7	60.2677	83.2926
68.7	66.9	59.4437	78.8053	68.5	69.7	78.8053	83.2926
68.7	66.9	84.0272	78.8053	68.5	69.8	78.8053	83.2926
68.9	66.9	84.0272	88.656	68.5	69.8	88.656	87.0731
68.9	66.9	80.687	60.3857	68.5	69.8	60.3857	87.0731
69	66.9	80.687	70.45	68.5	70	70.45	87.0731
69	66.9	82.9566	79.0413	68.5	70	79.0413	67.4373
69	66.9	51.8479	88.9214	68.5	70	88.9214	89.9164
69.1	66.9	51.8479	78.6683	68.5	70	78.6683	85.7831
69.1	67	51.7148	78.6683	68.5	70	78.6683	81.2022
69.1	67	64.6435	89.6164	68.5	70	89.6164	81.2022
69.1	67.1	77.5722	59.7443	68.5	70	59.7443	81.2022
69.2	67.1	85.6105	89.2773	68.5	70	89.2773	81.2022
69.2	67.1	64.2079	89.2773	68.5	70	89.2773	81.2022
69.2	67.1	64.2079	59.5182	68.5	70	59.5182	81.2022
69.3	67.4	71.2626	59.5182	68.5	70	59.5182	81.2022
69.3	67.4	89.2773	83.6573	68.5	70	83.6573	81.2022
69.3	67.5	89.8066	83.6573	68.5	70	83.6573	81.2022
69.3	67.5	70.7214	83.6573	68.5	70	83.6573	78.7874
69.3	67.5	70.7214	80.7704	68.5	70	80.7704	59.0906
69.3	67.7	82.6624	57.6931	68.5	70.1	57.6931	81.5101
69.3	67.7	75.3245	83.0493	68.5	70.1	83.0493	61.1326
69.3	68.2	86.0851	77.8542	68.5	70.1	77.8542	71.3213
69.3	68.2	86.0851	76.4212	68.5	70.2	76.4212	81.3438
69.3	68.2	86.0851	86.1081	68.5	70.2	86.1081	71.1758
69.3	68.2	86.8787	73.807	68.5	70.2	73.807	75.1086
69.4	68.2	86.8787	86.1081	68.5	70.2	86.1081	75.1086
69.4	68.2	59.2097	73.807	68.5	70.2	73.807	71.4263
69.4	68.2	86.5493	61.5058	68.5	70.2	61.5058	81.6301
69.5	68.2	68.4931	84.8467	68.5	70.3	84.8467	61.2226
69.5	68.4	78.2779	84.8467	68.6	70.3	84.8467	81.6301
69.5	68.4	88.0626	63.635	68.6	70.3	63.635	72.1981
69.5	68.5	88.0626	79.2623	68.6	70.3	79.2623	79.2623
69.5	68.5	58.7084	89.1701	68.6	70.3	89.1701	89.1701
69.5	68.5	60.3637	80.8658	68.6	70.3	80.8658	80.8658
69.5	68.5	80.4849	80.8658	68.6	70.3	80.8658	80.8658
69.5	68.5	80.4849		68.6	70.3	80.4849
69.5	68.5	60.3637		68.6	70.3	60.3637
69.5	68.5	88.0686		68.6	70.3	88.0686
69.5	68.5	78.2832		68.6	70.3	78.2832
69.5	68.5	88.0686		68.6	70.4	88.0686
69.5	68.5	88.0686		68.6	70.4	88.0686
69.5	68.5	88.2105		68.6	70.6	88.2105
69.5	68.5	88.2105		68.6	70.6	88.2105
69.5	68.5	80.2156		68.6	70.6	80.2156
69.5	68.5	70.1887		68.6	70.7	70.1887
69.6	68.5	71.0709		68.6	70.7	71.0709
69.6	68.5	81.2239		68.6	70.7	81.2239
69.6	68.5	81.0536		68.6	70.7	81.0536
69.6	68.5	81.0536		68.6	70.7	81.0536
69.6	68.5	58.7132		68.6	70.7	58.7132
69.6	68.5	88.0699		68.6	70.7	88.0699
69.6	68.5	88.0699		68.6	70.7	88.0699
69.6	68.5	88.0699		68.6	70.9	88.0699
69.6	68.5	81.7839		68.6	70.9	81.7839
69.6	68.5	81.7839		68.6	70.9	81.7839
69.6	68.5	59.104		68.6	70.9	59.104
69.7	68.5	59.104		68.6	71	59.104
69.7	68.5	88.656		68.6	71	88.656
69.7	68.5	78.338		68.6	71.1	78.338
69.7	68.5	79.3985		68.6	71.1	79.3985
69.7	68.5	89.3233		68.6	71.1	89.3233
69.7	68.5	88.1458		68.6	71.1	88.1458
69.7	68.5	85.9829		68.6	71.1	85.9829
69.7	68.5	64.4872		68.7	71.2	64.4872
69.8	68.5	85.1617		68.7	71.2	85.1617
69.8	68.5	71.8661		68.7	71.2	71.8661
69.8	68.6	51.3329		68.7	71.2	51.3329
69.8	68.6	71.8661		68.7	71.2	71.8661
69.8	68.6	69.569		68.7	71.2	69.569
69.8	68.6	69.569		68.7	71.3	69.569
69.9	68.6	89.4459		68.7	71.3	89.4459
69.9	68.6	81.4467		68.7	71.4	81.4467
69.9	68.6			68.7	71.4
69.9	68.6			68.7	71.4
69.9	68.6			68.7	71.4
69.9	68.6			68.7	71.5
69.9	68.6			68.7	71.5
69.9	68.6			68.7	71.5
69.9	68.6			68.7	71.5
69.9	68.6			68.7	71.5
69.9	68.6			68.7	71.5
69.9	68.6			68.8	71.5
69.9	68.6			68.8	71.6
69.9	68.6			68.8	71.6
70	68.6			68.8	71.6
70	68.6			68.8	71.6
70	68.7			68.8	71.6
70.1	68.7			68.8	71.6
70.1	68.7			68.8	71.6
70.1	68.7			68.8	71.6
70.1	68.7			68.8	71.6
70.2	68.7			68.8	71.6
70.2	68.7			68.8	71.6
70.2	68.7			68.8	71.6
70.2	68.7			68.8	71.6
70.2	68.7			68.8	71.6
70.2	68.7			68.8	71.7
70.2	68.7			68.8	71.7
70.2	68.7			68.8	71.7
70.3	68.7			68.9	71.7
70.3	68.7			68.9	71.7
70.3	68.7			68.9	71.7
70.3	68.7			68.9	71.7
70.3	68.7			68.9	71.7
70.3	68.7			68.9	71.7
70.3	68.7			68.9	71.9
70.3	68.7			69	72.1
70.3	68.8			69	72.1
70.4	68.8			69	72.1
70.4	68.8			69	72.2
70.4	68.8			69.1	72.2
70.4	68.8			69.1	72.2
70.4	68.8			69.1	72.2
70.4	68.8			69.1	72.2
70.4	68.8			69.1	72.2
70.4	68.8			69.1	72.2
70.5	68.8			69.1	72.2
70.5	68.8			69.2	72.2
70.5	68.8			69.2	72.3
70.5	68.8			69.2	72.3
70.5	68.8			69.2	72.4
70.5	68.8			69.2	72.4
70.5	68.8			69.2	72.6
70.6	68.8			69.2	72.6
70.6	68.9			69.2	72.8
70.6	68.9			69.3	72.8
70.6	68.9			69.3	72.8
70.6	68.9			69.3	72.8
70.6	68.9			69.3	72.8
70.6	68.9			69.3	72.8
70.9	68.9			69.4	72.8
70.9	69			69.4	73
70.9	69			69.4	73
70.9	69			69.4	73
70.9	69			69.4	73
70.9	69			69.4	73
70.9	69			69.4	73
70.9	69			69.4	73
70.9	69.1			69.4	73
70.9	69.1			69.4	73
70.9	69.1			69.4	73
70.9	69.1			69.5	73
70.9	69.1			69.5	73.1
70.9	69.1			69.5	73.2
70.9	69.1			69.5	73.2
70.9	69.2			69.5	73.2
71.1	69.2			69.6	73.2
71.1	69.2			69.6	73.3
71.1	69.2			69.6	73.3
71.1	69.2			69.6	73.3
71.1	69.2			69.6	73.3
71.1	69.2			69.6	73.3
71.2	69.2			69.6	73.3
71.2	69.2			69.6	73.3
71.2	69.2			69.6	73.4
71.3	69.2			69.6	73.4
71.3	69.2			69.6	73.4
71.3	69.2			69.6	73.4
71.3	69.2			69.6	73.4
71.3	69.2			69.6	73.5
71.3	69.2			69.6	73.6
71.3	69.2			69.6	73.7
71.3	69.3			69.7	73.7
71.4	69.3			69.7	73.7
71.4	69.3			69.7	73.8
71.4	69.3			69.7	73.8
71.4	69.3			69.7	74
71.4	69.3			69.7	74
71.4	69.3			69.7	74
71.4	69.3			69.7	74.1
71.4	69.3			69.7	74.1
71.4	69.5			69.7	74.1
71.4	69.5			69.7	74.1
71.4	69.5			69.8	74.1
71.4	69.5			69.8	74.2
71.4	69.5			69.8	74.2
71.4	69.5			69.8	74.2
71.4	69.5			69.8	74.2
71.5	69.5			69.8	74.2
71.5	69.6			69.9	74.2
71.5	69.6			69.9	74.4
71.6	69.6			70	74.4
71.6	69.6			70	74.4
71.6	69.6			70	74.4
71.6	69.6			70	74.4
71.6	69.6			70	74.4
71.6	69.6			70	74.5
71.6	69.6			70	74.5
71.6	69.6			70	74.5
71.6	69.6			70	74.5
71.7	69.6			70	74.5
71.7	69.6			70	74.5
71.7	69.6			70	74.5
71.7	69.6			70	74.5
71.7	69.6			70	74.5
71.7	69.6			70	74.5
71.7	69.7			70	74.5
71.8	69.7			70	74.5
71.8	69.7			70	74.5
71.8	69.7			70.1	74.6
71.8	69.7			70.1	74.6
71.8	69.7			70.2	74.7
71.8	69.7			70.2	74.7
71.8	69.7			70.3	74.7
71.8	69.7			70.3	74.8
71.8	69.8			70.4	74.8
71.9	69.8			70.4	74.8
71.9	69.8			70.4	74.8
71.9	69.8			70.4	74.9
72	69.8			70.4	74.9
72	69.8			70.4	75.2
72	69.8			70.4	75.2
72.2	69.8			70.5	75.3
72.2	69.8			70.5	75.3
72.2	69.8			70.6	75.3
72.2	70			70.6	75.3
72.2	70			70.6	75.3
72.2	70.2			70.6	75.3
72.2	70.2			70.6	75.3
72.2	70.2			70.7	75.3
72.3	70.2			70.7	75.3
72.3	70.2			70.7	75.3
72.3	70.4			70.7	75.3
72.3	70.4			70.7	75.3
72.3	70.4			70.8	75.6
72.3	70.4			70.8	75.6
72.4	70.4			70.8	75.7
72.4	70.4			70.8	75.8
72.4	70.4			70.8	75.8
72.4	70.4			70.8	75.9
72.4	70.4			70.9	75.9
72.5	70.4			70.9	75.9
72.6	70.4			70.9	75.9
72.6	70.4			70.9	75.9
72.6	70.4			70.9	76
72.7	70.4			71	76
72.8	70.4			71	76
72.8	70.4			71	76
72.8	70.5			71	76
72.9	70.5			71	76
72.9	70.5			71	76
72.9	70.5			71	76
72.9	70.5			71	76
72.9	70.5			71	76
72.9	70.5			71	76
72.9	70.5			71	76.2
72.9	70.5			71.1	76.2
72.9	70.5			71.1	76.5
73.1	70.5			71.1	76.6
73.1	70.6			71.1	76.6
73.1	70.6			71.1	76.6
73.1	70.6			71.1	76.6
73.1	70.6			71.1	76.6
73.1	70.6			71.1	76.6
73.2	70.6			71.2	76.6
73.2	70.7			71.2	76.6
73.2	70.7			71.2	76.6
73.2	70.7			71.2	76.6
73.2	70.7			71.2	76.6
73.2	70.8			71.2	76.6
73.2	70.8			71.2	76.6
73.2	70.8			71.2	76.8
73.8	70.8			71.2	76.8
73.8	70.8			71.2	76.8
73.8	70.8			71.4	76.8
73.8	70.8			71.4	76.8
73.8	70.8			71.5	76.8
73.9	70.8			71.5	76.8
73.9	70.8			71.5	76.8
73.9	70.9			71.5	76.8
73.9	70.9			71.6	76.8
73.9	70.9			71.6	76.9
74	71			71.6	76.9
74	71			71.6	76.9
74	71			71.6	77
74	71			71.6	77
74	71.1			71.6	77.1
74.1	71.1			71.8	77.1
74.1	71.1			71.9	77.1
74.2	71.1			71.9	77.2
74.2	71.1			71.9	77.2
74.2	71.1			71.9	77.2
74.2	71.1			71.9	77.2
74.2	71.1			72	77.2
74.3	71.1			72	77.2
74.3	71.1			72	77.2
74.3	71.1			72	77.2
74.3	71.1			72.1	77.3
74.3	71.2			72.1	77.3
74.4	71.3			72.1	77.4
74.4	71.3			72.1	77.4
74.4	71.3			72.1	77.4
74.5	71.3			72.1	77.4
74.5	71.3			72.1	77.5
74.8	71.4			72.2	77.5
74.8	71.4			72.2	77.5
74.8	71.4			72.2	77.8
74.8	71.4			72.3	77.8
74.8	71.5			72.3	77.8
75.4	71.5			72.3	77.8
75.4	71.5			72.3	77.8
75.4	71.5			72.3	77.8
75.7	71.5			72.3	77.8
75.7	71.5			72.3	77.8
75.7	71.5			72.3	77.8
75.7	71.5			72.3	77.8
75.7	71.5			72.3	77.8
75.7	71.5			72.3	77.8
75.8	71.5			72.3	78.1
75.8	71.6			72.3	78.2
75.8	71.6			72.3	78.2
75.8	71.6			72.4	78.2
76.1	71.6			72.4	78.2
76.1	71.6			72.4	78.2
76.1	71.6			72.4	78.2
76.2	71.8			72.4	78.2
76.6	71.8			72.4	78.2
76.6	71.8			72.4	78.3
76.6	71.8			72.5	78.3
76.6	71.8			72.5	78.3
76.6	71.8			72.5	78.3
76.6	71.8			72.5	78.3
76.6	71.8			72.5	78.3
76.6	71.8			72.5	78.3
76.6	71.8			72.6	78.3
76.9	71.8			72.6	78.3
76.9	71.8			72.6	78.3
76.9	71.9			72.6	78.3
77.1	71.9			72.6	78.3
77.1	71.9			72.6	78.3
77.1	72			72.8	78.3
77.2	72			72.8	78.3
77.3	72			72.8	78.3
77.3	72			72.8	78.3
77.3	72			72.8	78.3
77.6	72.1			72.8	78.3
77.6	72.1			72.8	78.3
77.6	72.1			72.8	78.3
77.8	72.1			72.8	78.3
77.8	72.1			72.8	78.3
77.8	72.1			72.9	78.3
77.8	72.2			72.9	78.3
77.8	72.2			72.9	78.3
78	72.2			72.9	78.3
78	72.2			72.9	78.3
78.3	72.2			72.9	78.3
78.3	72.2			72.9	78.3
78.3	72.3			72.9	78.3
78.3	72.3			72.9	78.3
78.3	72.3			72.9	78.3
78.3	72.3			72.9	78.3
78.3	72.3			72.9	78.3
78.3	72.3			72.9	78.3
78.3	72.3			72.9	78.3
78.3	72.3			72.9	78.3
78.3	72.3			73	78.3
78.3	72.4			73	78.3
78.3	72.4			73	78.3
78.3	72.4			73	78.3
78.3	72.4			73	78.3
78.3	72.4			73	78.3
78.3	72.4			73	78.3
78.3	72.5			73	78.3
78.3	72.5			73	78.3
78.4	72.5			73	78.3
78.4	72.5			73	78.3
78.4	72.5			73	78.3
78.4	72.5			73	78.3
78.4	72.5			73	78.3
78.4	72.5			73	78.3
78.4	72.5			73.1	78.4
78.4	72.5			73.1	78.4
78.4	72.5			73.1	78.4
78.4	72.5			73.1	78.4
78.4	72.6			73.1	78.4
78.4	72.6			73.2	78.4
78.4	72.7			73.2	78.4
78.4	72.7			73.2	78.4
78.4	72.7			73.3	78.5
78.4	72.7			73.3	78.7
78.4	72.7			73.3	78.7
78.4	72.7			73.3	78.7
78.5	72.7			73.3	78.7
78.5	72.9			73.3	78.7
78.5	73			73.3	78.7
78.5	73			73.3	78.7
78.5	73			73.3	78.7
78.5	73			73.3	78.7
78.5	73			73.3	78.8
78.5	73			73.3	78.8
78.6	73.1			73.4	78.8
78.6	73.1			73.4	78.8
78.8	73.3			73.4	78.9
78.8	73.3			73.4	78.9
78.8	73.3			73.4	78.9
78.9	73.3			73.4	78.9
78.9	73.4			73.4	78.9
78.9	73.4			73.4	78.9
78.9	73.4			73.4	79
78.9	73.4			73.4	79
78.9	73.4			73.4	79
78.9	73.4			73.4	79.1
79	73.4			73.4	79.1
79.1	73.5			73.5	79.1
79.1	73.5			73.5	79.2
79.1	73.5			73.5	79.2
79.1	73.5			73.5	79.2
79.1	73.5			73.5	79.3
79.1	73.5			73.5	79.3
79.1	73.6			73.6	79.3
79.1	73.6			73.6	79.5
79.3	73.6			73.6	79.5
79.3	73.6			73.6	79.5
79.3	73.8			73.6	79.5
79.5	73.8			73.8	79.5
79.5	73.8			73.8	79.5
79.5	73.8			73.8	79.5
79.5	73.8			73.8	79.5
79.5	73.8			73.8	79.5
79.5	73.9			73.8	79.5
79.5	73.9			73.8	79.5
79.6	73.9			73.8	79.5
79.6	73.9			73.8	79.5
79.6	74			73.8	79.5
79.6	74			73.8	79.5
79.6	74			74	79.5
79.6	74			74	79.5
79.6	74			74	79.5
79.6	74			74.2	79.5
79.7	74			74.2	79.5
79.7	74			74.2	79.5
79.7	74			74.2	79.6
79.7	74			74.6	79.7
79.7	74.1			74.6	79.7
79.7	74.1			74.6	79.7
79.7	74.1			74.6	79.7
79.8	74.2			74.6	79.7
79.8	74.2			74.6	79.8
79.8	74.2			74.7	79.8
79.8	74.2			74.7	79.8
79.9	74.2			74.7	79.9
79.9	74.2			75	80
79.9	74.2			75	80
79.9	74.2			75	80
80	74.2			75.1	80
80	74.6			75.1	80.1
80.1	74.6			75.1	80.1
80.1	74.6			75.2	80.1
80.1	74.6			75.2	80.1
80.2	74.6			75.2	80.1
80.2	74.6			75.2	80.1
80.2	74.7			75.4	80.1
80.2	74.7			75.4	80.1
80.2	74.8			75.6	80.1
80.2	74.8			75.6	80.2
80.3	74.8			75.7	80.2
80.3	74.8			75.9	80.2
80.4	74.8			75.9	80.2
80.4	74.8			75.9	80.2
80.4	74.8			75.9	80.2
80.4	74.9			76	80.2
80.4	74.9			76	80.2
80.6	74.9			76	80.2
80.6	74.9			76.1	80.2
80.6	74.9			76.1	80.3
80.7	74.9			76.1	80.3
80.8	75			76.1	80.3
80.9	75			76.1	80.4
80.9	75			76.1	80.4
80.9	75.1			76.1	80.4
80.9	75.1			76.1	80.7
80.9	75.1			76.1	80.7
81	75.1			76.1	80.8
81	75.1			76.2	81.1
81	75.1			76.2	81.1
81	75.4			76.2	81.1
81	75.4			76.2	81.1
81.2	75.4			76.3	81.1
81.2	75.4			76.3	81.1
81.3	75.4			76.3	81.1
81.3	75.7			76.3	81.1
81.3	75.7			76.6	81.1
81.3	75.8			76.6	81.1
81.3	76.2			76.6	81.2
81.3	76.2			76.6	81.2
81.3	76.2			76.6	81.2
81.4	76.2			76.8	81.2
81.4	76.2			77	81.2
81.4	76.3			77	81.2
81.5	76.3			77	81.2
81.5	76.3			77.2	81.2
81.5	76.3			77.2	81.2
81.5	76.5			77.2	81.2
81.5	76.5			78.3	81.2
81.5	76.5			78.3	81.2
81.6	76.5			78.3	81.2
81.6	76.5			78.3	81.2
81.6	76.6			78.3	81.4
81.6	76.8			78.3	81.4
81.6	76.8			78.3	81.5
81.6	76.8			78.3	81.5
81.6	76.8			78.3	81.5
81.6	76.8			78.3	81.5
81.6	76.8			78.3	81.5
81.7	76.8			78.3	81.5
81.7	76.8			78.3	81.5
81.7	76.9			78.3	81.5
81.7	76.9			78.3	81.5
81.7	76.9			78.3	81.6
81.7	76.9			78.3	81.6
81.7	77			78.3	81.6
81.8	77			78.3	81.7
81.8	77			78.3	81.7
81.8	77			78.3	81.8
81.8	77			78.3	81.8
81.8	77.1			78.3	81.8
81.8	77.2			78.3	81.8
81.9	77.2			78.3	81.8
81.9	77.2			78.3	81.8
81.9	77.2			78.3	81.9
81.9	77.2			78.3	82.1
82	77.2			78.3	82.1
82	77.4			78.3	82.1
82	77.6			78.3	82.1
82.1	77.7			78.3	82.1
82.1	77.8			78.3	82.2
82.2	77.8			78.3	82.2
82.3	77.9			78.3	82.3
82.4	77.9			78.3	82.4
82.4	78			78.3	82.5
82.4	78			78.3	82.5
82.5	78			78.3	82.5
82.5	78.2			78.3	82.5
82.5	78.2			78.3	82.5
82.6	78.3			78.3	82.7
82.6	78.3			78.3	83.2
82.7	78.3			78.3	83.2
82.7	78.3			78.3	83.2
82.7	78.3			78.3	83.2
82.8	78.3			78.3	83.4
82.8	78.3			78.3	83.4
82.8	78.3			78.3	83.4
83.2	78.3			78.4	83.4
83.2	78.3			78.4	83.4
83.3	78.3			78.4	83.4
83.3	78.3			78.4	83.4
83.5	78.4			78.4	83.5
83.5	78.4			78.4	83.5
83.5	78.4			78.4	83.6
83.5	78.4			78.4	83.6
83.7	78.4			78.4	83.7
83.7	78.4			78.4	83.7
83.7	78.4			78.4	84.2
83.7	78.4			78.4	84.5
83.7	78.5			78.4	84.6
83.7	78.5			78.4	84.6
83.7	78.5			78.4	84.8
83.7	78.5			78.4	85.2
83.7	78.5			78.4	85.2
84.3	78.5			78.4	85.4
84.3	78.6			78.4	85.4
84.4	78.6			78.4	85.5
84.4	78.6			78.4	85.6
84.4	78.6			78.4	85.6
84.5	78.6			78.4	85.6
84.6	78.6			78.4	85.9
84.8	78.6			78.4	85.9
84.9	78.6			78.4	86.1
84.9	78.6			78.4	86.1
85.2	78.6			78.4	86.1
85.3	78.6			78.4	86.1
86.2	78.6			78.4	86.1
87.3	78.6			78.4	86.4
87.3	78.6			78.4	86.4
87.3	78.6			78.5	86.6
87.3	78.6			78.5	86.6
87.5	78.6			78.5	86.6
88.1	78.6			78.5	86.6
88.1	78.6			78.5	86.6
88.1	78.6			78.5	86.6
88.1	78.6			78.5	86.6
88.1	78.7			78.5	86.7
88.1	78.7			78.5	86.7
88.1	78.9			78.5	86.7
88.2	78.9			78.5	86.7
88.2	78.9			78.5	86.7
88.2	79			78.5	86.7
88.2	79			78.5	86.8
88.2	79			78.5	86.8
88.3	79.1			78.5	86.8
88.8	79.1			78.5	86.8
89.2	79.2			78.5	86.8
89.3	79.2			78.5	86.9
89.3	79.2			78.5	87.4
89.4	79.2			78.5	87.5
89.4	79.2			78.5	87.5
89.4	79.2			78.5	87.5
89.5	79.2			78.5	87.8
89.5	79.2			78.6	88
89.6	79.2			78.6	88.1
89.6	79.4			78.6	88.1
89.6	79.4			78.6	88.1
89.6	79.4			78.6	88.1
89.7	79.4			78.6	88.1
89.7	79.4			78.6	88.1
89.7	79.4			78.6	88.1
89.7	79.5			78.6	88.1
89.8	79.5			78.6	88.1
89.8	79.5			78.6	88.1
89.9	79.5			78.6	88.1
89.9	79.6			78.6	88.1
89.9	79.6			78.7	88.1
89.9	79.6			78.7	88.2
89.9	79.6			78.8	88.2
	79.6			78.8	88.2
	79.6			78.8	88.2
	79.6			78.8	88.5
	79.6			78.8	88.6
	79.6			78.8	88.6
	79.6			78.8	88.8
	79.6			78.8	88.9
	79.6			78.8	89
	79.6			78.8	89.3
	79.6			78.8	89.3
	79.6			78.9	89.3
	79.6			78.9	89.3
	79.7			78.9	89.4
	79.7			78.9	89.4
	79.7			78.9	89.4
	79.7			78.9	89.5
	79.7			78.9	89.5
	79.7			79	89.7
	79.7			79	89.7
	79.7			79	79.7
	79.7			79	79.7
	79.7			79	79.7
	79.7			79.1	79.7
	79.7			79.1	79.7
	79.7			79.1	79.7
	79.7			79.1	79.7
	79.7			79.1	79.7
	79.7			79.1	79.7
	79.8			79.1	79.8
	79.8			79.2	79.8
	79.8			79.2	79.8
	79.8			79.2	79.8
	79.8			79.2	79.8
	79.8			79.2	79.8
	79.8			79.2	79.8
	79.8			79.2	79.8
	80			79.2	80
	80.2			79.2	80.2
	80.2			79.3	80.2
	80.3			79.3	80.3
	80.4			79.3	80.4
	80.4			79.3	80.4
	80.4			79.3	80.4
	80.5			79.3	80.5
	80.5			79.3	80.5
	80.5			79.3	80.5
	80.5			79.5	80.5
	80.5			79.5	80.5
	80.5			79.5	80.5
	80.5			79.6	80.5
	80.5			79.6	80.5
	80.5			79.6	80.5
	80.5			79.6	80.5
	80.7			79.6	80.7
	80.7			79.7	80.7
	80.7			79.7	80.7
	80.7			79.7	80.7
	80.7			79.8	80.7
	80.8			79.8	80.8
	80.8			79.8	80.8
	80.8			79.9	80.8
	80.8			79.9	80.8
	80.8			79.9	80.8
	80.8			79.9	80.8
	80.9			79.9	80.9
	80.9			80	80.9
	80.9			80	80.9
	80.9			80	80.9
	81			80.2	81
	81			80.2	81
	81			80.4	81
	81			80.4	81
	81			80.4	81
	81			80.4	81
	81			80.4	81
	81.1			80.4	81.1
	81.1			80.5	81.1
	81.1			80.5	81.1
	81.1			80.5	81.1
	81.1			80.5	81.1
	81.2			80.5	81.2
	81.2			80.5	81.2
	81.2			80.5	81.2
	81.2			80.5	81.2
	81.3			80.5	81.3
	81.3			80.5	81.3
	81.3			80.5	81.3
	81.3			80.5	81.3
	81.3			80.5	81.3
	81.4			80.6	81.4
	81.4			80.6	81.4
	81.4			80.6	81.4
	81.5			80.6	81.5
	81.5			80.6	81.5
	81.5			80.6	81.5
	81.7			80.6	81.7
	81.7			80.7	81.7
	81.7			80.7	81.7
	81.7			80.7	81.7
	81.7			80.8	81.7
	81.8			80.8	81.8
	82.1			80.8	82.1
	82.1			80.8	82.1
	82.2			80.8	82.2
	82.2			80.8	82.2
	82.2			80.8	82.2
	82.4			80.9	82.4
	82.4			80.9	82.4
	82.4			80.9	82.4
	82.4			81	82.4
	82.4			81	82.4
	82.4			81	82.4
	82.4			81.1	82.4
	82.7			81.1	82.7
	82.7			81.1	82.7
	82.7			81.1	82.7
	82.7			81.1	82.7
	82.7			81.1	82.7
	82.7			81.1	82.7
	82.7			81.3	82.7
	82.7			81.3	82.7
	82.7			81.3	82.7
	82.7			81.3	82.7
	82.8			81.3	82.8
	82.8			81.3	82.8
	82.8			81.3	82.8
	82.8			81.3	82.8
	82.8			81.3	82.8
	82.9			81.3	82.9
	83			81.3	83
	83			81.3	83
	83.2			81.3	83.2
	83.2			81.3	83.2
	83.4			81.3	83.4
	83.4			81.6	83.4
	83.4			81.7	83.4
	83.5			81.7	83.5
	83.6			81.7	83.6
	83.7			81.7	83.7
	83.7			81.7	83.7
	83.8			81.7	83.8
	83.8			81.7	83.8
	83.8			81.7	83.8
	83.9			81.8	83.9
	84			81.8	84
	84			81.8	84
	84			81.8	84
	84			82.1	84
	84			82.2	84
	84			82.3	84
	84			82.3	84
	84			82.3	84
	84			82.3	84
	84.5			82.4	84.5
	84.5			82.4	84.5
	84.5			82.4	84.5
	85.3			82.5	85.3
	85.6			82.6	85.6
	85.8			82.6	85.8
	85.8			82.6	85.8
	85.8			82.6	85.8
	85.8			82.7	85.8
	86.2			82.7	86.2
	86.5			82.7	86.5
	86.5			82.8	86.5
	86.5			82.8	86.5
	86.6			82.8	86.6
	86.9			82.8	86.9
	87			82.8	87
	87.2			83	87.2
	87.2			83	87.2
	87.3			83	87.3
	87.3			83	87.3
	87.3			83	87.3
	87.4			83.2	87.4
	87.8			83.2	87.8
	87.9			83.2	87.9
	88			83.2	88
	88			83.2	88
	88			83.3	88
	88.1			83.3	88.1
	88.1			83.3	88.1
	88.1			83.3	88.1
	88.1			83.3	88.1
	88.1			83.3	88.1
	88.2			83.3	88.2
	88.2			83.4	88.2
	88.2			83.4	88.2
	88.2			83.4	88.2
	88.2			83.4	88.2
	88.3			83.4	88.3
	88.4			83.4	88.4
	88.5			83.4	88.5
	88.5			83.4	88.5
	89			83.4	89
	89			83.4	89
	89			83.4	89
	89.1			83.5	89.1
	89.1			83.5	89.1
	89.2			83.5	89.2
	89.2			83.5	89.2
	89.3			83.5	89.3
	89.3			83.5	89.3
	89.3			83.6	89.3
	89.4			83.6	89.4
	89.5			83.7	89.5
	89.5			83.7	89.5
	89.5			83.7	89.5
	89.5			83.7	89.5
	89.5			83.7	89.5
	89.6			83.7	89.6
	89.7			83.8	89.7
	89.7			83.8	89.7
	89.8			83.8	89.8
	89.8			83.8	89.8
	83.8			83.8	83.8
	83.9			83.9	83.9
	83.9			83.9	83.9
	84			84	84
	84			84	84
	84			84	84
	84			84	84
	84.1			84.1	84.1
	84.4			84.4	84.4
	85.2			85.2	85.2
	85.3			85.3	85.3
	85.6			85.6	85.6
	85.6			85.6	85.6
	85.6			85.6	85.6
	85.6			85.6	85.6
	85.7			85.7	85.7
	85.7			85.7	85.7
	85.7			85.7	85.7
	85.8			85.8	85.8
	85.8			85.8	85.8
	86			86	86
	86			86	86
	86.1			86.1	86.1
	86.5			86.5	86.5
	86.5			86.5	86.5
	86.9			86.9	86.9
	86.9			86.9	86.9
	86.9			86.9	86.9
	87.1			87.1	87.1
	87.1			87.1	87.1
	87.5			87.5	87.5
	87.5			87.5	87.5
	87.8			87.8	87.8
	87.8			87.8	87.8
	87.8			87.8	87.8
	88			88	88
	88.1			88.1	88.1
	88.1			88.1	88.1
	88.1			88.1	88.1
	88.1			88.1	88.1
	88.1			88.1	88.1
	88.1			88.1	88.1
	88.1			88.1	88.1
	88.1			88.1	88.1
	88.1			88.1	88.1
	88.1			88.1	88.1
	88.1			88.1	88.1
	88.1			88.1	88.1
	88.1			88.1	88.1
	88.1			88.1	88.1
	88.1			88.1	88.1
	88.1			88.1	88.1
	88.1			88.1	88.1
	88.2			88.2	88.2
	88.2			88.2	88.2
	88.2			88.2	88.2
	88.2			88.2	88.2
	88.2			88.2	88.2
	88.3			88.3	88.3
	88.3			88.3	88.3
	88.3			88.3	88.3
	88.3			88.3	88.3
	88.3			88.3	88.3
	88.4			88.4	88.4
	88.4			88.4	88.4
	88.4			88.4	88.4
	88.4			88.4	88.4
	88.4			88.4	88.4
	88.4			88.4	88.4
	88.5			88.5	88.5
	88.5			88.5	88.5
	88.5			88.5	88.5
	88.5			88.5	88.5
	88.7			88.7	88.7
	88.8			88.8	88.8
	88.9			88.9	88.9
	88.9			88.9	88.9
	89			89	89
	89.1			89.1	89.1
	89.1			89.1	89.1
	89.1			89.1	89.1
	89.1			89.1	89.1
	89.1			89.1	89.1
	89.2			89.2	89.2
	89.2			89.2	89.2
	89.2			89.2	89.2
	89.3			89.3	89.3
	89.5			89.5	89.5
	89.5			89.5	89.5
	89.5			89.5	89.5
	89.5			89.5	89.5
	89.5			89.5	89.5
	89.7			89.7	89.7
	89.7			89.7	89.7
	89.7			89.7	89.7
	89.7			89.7	89.7
	89.9			89.9	89.9

## Sheet: Orientation
	Adult-C-0N	Adult-C-0N	Adult-C-0N	Adult-C-0N	Adult-C-0N	Adult-C-0N	Adult-C-0N	Adult-C-4N	Adult-C-4N	Adult-C-4N	Adult-C-4N	Adult-C-4N	Adult-C-4N	Aged-C-0N	Aged-C-0N	Aged-C-0N	Aged-C-0N	Aged-C-4N	Aged-C-4N	Aged-C-4N	Adult-H-0N	Adult-H-0N	Adult-H-0N	Adult-H-0N	Adult-H-0N	Adult-H-0N	Adult-H-0N	Adult-H-4N	Adult-H-4N	Adult-H-4N	Adult-H-4N	Adult-H-4N	Adult-H-4N	Adult-H-4N	Aged-H-0N	Aged-H-0N	Aged-H-0N	Aged-H-0N	Aged-H-0N	Aged-H-4N	Aged-H-4N	Aged-H-4N
0-10	55.9322	21.0526	35.7143	35.1351	45.9459	29.0909	48.3333	57.6271	38.3333	21.6216	32.3529	52.6316	22.8571	31.7073	7.8947	51.1628	74.4681	49.0909	22	10	14.2857	62.1622	53.3333	51.4286	27.027	29.8246	28.8136	70	7.01754	44.0678	47.2222	12.5	20	43.5897	21.25	10.5263	30.5556	3.61446	12.6437	21.2766	1.08696	18.75
10-20	37.2881	26.3158	32.1429	27.027	37.8378	14.5455	26.6667	18.6441	43.3333	21.6216	14.7059	1.75439	0	27.6423	23.6842	33.7209	10.6383	23.6364	18	34	42.8571	18.9189	16.6667	5.71429	18.9189	29.8246	25.4237	20	29.8246	42.3729	11.1111	12.5	31.6667	12.8205	21.25	0	25	10.8434	8.04598	24.4681	11.9565	31.25
20-30	6.77966	19.2982	21.4286	18.9189	13.5135	36.3636	11.6667	8.47458	11.6667	40.5405	26.4706	12.2807	31.4286	16.2602	34.2105	3.4884	1.0638	12.7273	18	28	14.2857	5.40541	16.6667	8.57143	10.8108	15.7895	16.9492	10	17.5439	8.47458	8.33333	12.5	25	12.8205	13.75	10.5263	11.1111	19.2771	18.3908	18.0851	15.2174	50
30-40	0	24.5614	3.57143	18.9189	2.7027	3.63636	11.6667	10.1695	1.66667	8.10811	17.6471	10.5263	20	10.5691	15.7895	1.1628	3.1915	5.45455	18	10	10.7143	2.7027	13.3333	25.7143	8.10811	17.5439	10.1695	0	24.5614	3.38983	13.8889	62.5	18.3333	2.5641	26.25	63.1579	30.5556	18.0723	21.8391	9.57447	20.6522	0
40-50	0	3.50877	5.35714	0	0	3.63636	1.66667	5.08475	3.33333	8.10811	5.88235	14.0351	14.2857	8.9431	5.2632	3.4884	3.1915	9.09091	12	14	7.14286	2.7027	0	8.57143	8.10811	7.01754	11.8644	0	14.0351	1.69492	11.1111	0	5	17.9487	8.75	10.5263	2.77778	20.4819	29.8851	5.31915	25	0
50-60	0	5.26316	1.78571	0	0	12.7273	0	0	1.66667	0	2.94118	8.77193	11.4286	4.878	13.1579	6.9767	7.4468	0	12	4	10.7143	8.10811	0	0	27.027	0	6.77966	0	7.01754	0	8.33333	0	0	10.2564	8.75	5.26316	0	27.7108	9.1954	21.2766	26.087	0

## Sheet: Radial Elastic Modulus
Adult-control-0N	Adult-control-4N	Aged-control-0N	Aged-control-4N	Adult-HLU-0N	Adult-HLU-4N	Aged-HLU-0N	Aged-HLU-4N
0.0121	0.0112	0.121	0.132	0.0109	0.0323	0.0101	0.0101
0.0137	0.0196	0.156	0.16	0.027	0.0525	0.0107	0.0101
0.0248	0.0315	0.232	0.235	0.0382	0.0527	0.0116	0.0105
0.0282	0.0358	0.239	0.27	0.0391	0.0838	0.0117	0.0106
0.0366	0.0429	0.243	0.29	0.053	0.133	0.0122	0.0107
0.039	0.0483	0.282	0.295	0.0559	0.136	0.0126	0.0107
0.0402	0.0647	0.297	0.318	0.0589	0.139	0.013	0.0109
0.0455	0.0794	0.3	0.348	0.0692	0.145	0.014	0.011
0.0473	0.0795	0.314	0.349	0.0741	0.16	0.0145	0.0111
0.0477	0.0971	0.315	0.35	0.0765	0.162	0.0154	0.0111
0.0591	0.0979	0.332	0.353	0.0775	0.166	0.0168	0.0113
0.0602	0.114	0.336	0.354	0.0818	0.168	0.0174	0.0114
0.0618	0.146	0.336	0.355	0.0945	0.169	0.0181	0.0119
0.0641	0.146	0.352	0.36	0.0982	0.171	0.0183	0.0122
0.0647	0.151	0.354	0.361	0.0983	0.172	0.0189	0.0123
0.07	0.151	0.357	0.362	0.101	0.172	0.0199	0.0123
0.0736	0.161	0.36	0.367	0.101	0.174	0.0216	0.0123
0.0751	0.162	0.365	0.372	0.108	0.178	0.0224	0.0124
0.0798	0.166	0.366	0.372	0.113	0.179	0.0227	0.0126
0.097	0.167	0.369	0.376	0.114	0.179	0.0238	0.0127
0.0991	0.169	0.373	0.388	0.123	0.18	0.0241	0.0135
0.103	0.179	0.375	0.388	0.125	0.181	0.0246	0.0144
0.103	0.183	0.377	0.391	0.132	0.182	0.0255	0.0144
0.105	0.189	0.38	0.394	0.138	0.184	0.0261	0.0148
0.108	0.193	0.38	0.396	0.139	0.185	0.027	0.0148
0.113	0.199	0.39	0.396	0.143	0.185	0.0284	0.015
0.12	0.202	0.393	0.4	0.143	0.185	0.0359	0.0154
0.121	0.207	0.396	0.4	0.144	0.187	0.037	0.0154
0.122	0.209	0.399	0.402	0.144	0.187	0.0375	0.0155
0.128	0.217	0.401	0.403	0.148	0.187	0.0387	0.0163
0.128	0.218	0.406	0.405	0.149	0.19	0.0422	0.0163
0.133	0.221	0.411	0.408	0.156	0.192	0.0457	0.0167
0.134	0.223	0.412	0.409	0.159	0.198	0.0475	0.0169
0.135	0.226	0.416	0.41	0.161	0.2	0.0503	0.0169
0.14	0.23	0.42	0.41	0.161	0.201	0.053	0.0169
0.141	0.231	0.427	0.414	0.161	0.202	0.0563	0.017
0.142	0.232	0.428	0.415	0.167	0.203	0.0583	0.0177
0.143	0.234	0.429	0.416	0.168	0.204	0.0597	0.0178
0.143	0.238	0.43	0.419	0.169	0.206	0.0598	0.0179
0.149	0.24	0.431	0.419	0.174	0.206	0.0689	0.0181
0.15	0.242	0.432	0.42	0.175	0.208	0.0697	0.019
0.153	0.242	0.435	0.422	0.176	0.208	0.0736	0.019
0.156	0.244	0.435	0.423	0.177	0.21	0.0749	0.0193
0.161	0.245	0.438	0.423	0.178	0.211	0.0756	0.0194
0.162	0.251	0.441	0.424	0.178	0.211	0.0985	0.0198
0.163	0.251	0.443	0.425	0.178	0.212	0.107	0.0199
0.164	0.251	0.444	0.426	0.184	0.214	0.11	0.0207
0.167	0.253	0.444	0.427	0.186	0.217	0.111	0.0216
0.169	0.253	0.444	0.427	0.188	0.217	0.117	0.0226
0.169	0.257	0.445	0.428	0.188	0.217	0.117	0.023
0.172	0.258	0.446	0.429	0.188	0.218	0.12	0.0234
0.172	0.258	0.446	0.43	0.19	0.219	0.127	0.0235
0.176	0.259	0.446	0.43	0.191	0.219	0.129	0.0238
0.176	0.261	0.448	0.43	0.193	0.221	0.131	0.0248
0.177	0.262	0.452	0.432	0.196	0.222	0.138	0.025
0.177	0.262	0.452	0.434	0.196	0.224	0.138	0.025
0.179	0.264	0.453	0.435	0.201	0.225	0.143	0.0251
0.179	0.266	0.454	0.436	0.202	0.227	0.152	0.0251
0.18	0.269	0.454	0.438	0.203	0.228	0.155	0.0257
0.18	0.269	0.455	0.438	0.205	0.229	0.157	0.026
0.182	0.269	0.456	0.438	0.207	0.23	0.157	0.0266
0.182	0.27	0.456	0.438	0.207	0.23	0.158	0.027
0.182	0.271	0.457	0.441	0.209	0.231	0.165	0.0272
0.183	0.271	0.457	0.442	0.209	0.231	0.169	0.0273
0.185	0.273	0.458	0.442	0.211	0.231	0.174	0.0274
0.185	0.275	0.461	0.442	0.211	0.232	0.176	0.0274
0.189	0.276	0.461	0.443	0.212	0.232	0.177	0.0283
0.194	0.277	0.463	0.446	0.212	0.234	0.209	0.029
0.196	0.278	0.464	0.446	0.213	0.235	0.217	0.0293
0.196	0.279	0.464	0.446	0.213	0.235	0.226	0.0305
0.199	0.279	0.465	0.446	0.214	0.238	0.229	0.031
0.201	0.28	0.468	0.447	0.215	0.238	0.233	0.0314
0.206	0.281	0.468	0.449	0.216	0.238	0.239	0.0318
0.207	0.286	0.468	0.449	0.217	0.241	0.239	0.0327
0.209	0.287	0.469	0.451	0.217	0.241	0.241	0.0327
0.209	0.288	0.469	0.451	0.218	0.241	0.242	0.0338
0.21	0.288	0.47	0.454	0.219	0.242	0.245	0.0338
0.211	0.29	0.471	0.455	0.219	0.242	0.25	0.035
0.212	0.29	0.471	0.455	0.219	0.242	0.257	0.0358
0.213	0.291	0.473	0.455	0.22	0.243	0.265	0.0375
0.215	0.293	0.473	0.457	0.22	0.243	0.267	0.0385
0.22	0.293	0.473	0.458	0.22	0.244	0.274	0.0402
0.221	0.294	0.473	0.459	0.22	0.244	0.276	0.0406
0.221	0.296	0.474	0.459	0.222	0.246	0.279	0.0413
0.223	0.297	0.475	0.46	0.222	0.246	0.281	0.0426
0.226	0.298	0.475	0.461	0.223	0.248	0.298	0.0433
0.229	0.298	0.476	0.462	0.227	0.249	0.307	0.0438
0.233	0.298	0.477	0.462	0.227	0.25	0.327	0.0455
0.235	0.298	0.477	0.462	0.228	0.25	0.337	0.046
0.235	0.3	0.477	0.462	0.229	0.251	0.347	0.047
0.24	0.301	0.478	0.463	0.229	0.251	0.347	0.0478
0.24	0.303	0.478	0.464	0.229	0.252	0.348	0.0485
0.243	0.305	0.479	0.465	0.23	0.252	0.348	0.049
0.243	0.306	0.48	0.466	0.23	0.255	0.352	0.0496
0.243	0.306	0.48	0.466	0.231	0.255	0.353	0.0528
0.245	0.307	0.48	0.466	0.231	0.256	0.354	0.0537
0.245	0.31	0.481	0.467	0.233	0.256	0.355	0.0541
0.247	0.311	0.481	0.468	0.233	0.258	0.36	0.0556
0.247	0.311	0.482	0.468	0.234	0.259	0.366	0.0563
0.249	0.312	0.482	0.469	0.234	0.259	0.371	0.057
0.249	0.313	0.482	0.47	0.234	0.26	0.376	0.0607
0.251	0.318	0.482	0.474	0.235	0.26	0.38	0.0615
0.252	0.322	0.483	0.474	0.236	0.261	0.381	0.0644
0.254	0.322	0.483	0.474	0.236	0.261	0.383	0.0645
0.256	0.324	0.483	0.475	0.237	0.261	0.386	0.0648
0.256	0.324	0.483	0.476	0.238	0.262	0.386	0.0654
0.256	0.324	0.483	0.481	0.239	0.264	0.386	0.0664
0.257	0.325	0.483	0.481	0.239	0.264	0.39	0.0674
0.257	0.325	0.485	0.482	0.241	0.265	0.39	0.0688
0.258	0.325	0.485	0.483	0.241	0.266	0.391	0.0705
0.26	0.326	0.486	0.483	0.242	0.268	0.392	0.0714
0.26	0.326	0.486	0.483	0.242	0.27	0.394	0.0723
0.261	0.326	0.487	0.485	0.242	0.27	0.401	0.0732
0.264	0.329	0.488	0.486	0.243	0.271	0.407	0.0733
0.264	0.329	0.488	0.487	0.243	0.271	0.408	0.0739
0.264	0.329	0.489	0.487	0.244	0.271	0.409	0.0745
0.265	0.33	0.49	0.489	0.245	0.271	0.409	0.075
0.265	0.33	0.49	0.49	0.247	0.272	0.415	0.0755
0.266	0.331	0.49	0.49	0.247	0.272	0.419	0.0783
0.266	0.332	0.491	0.491	0.248	0.272	0.419	0.0785
0.267	0.333	0.492	0.492	0.249	0.272	0.423	0.0801
0.268	0.335	0.493	0.493	0.25	0.273	0.423	0.0802
0.268	0.335	0.493	0.493	0.25	0.273	0.424	0.0818
0.27	0.336	0.493	0.494	0.25	0.273	0.425	0.0823
0.271	0.336	0.494	0.496	0.251	0.274	0.426	0.0825
0.273	0.339	0.496	0.498	0.251	0.274	0.427	0.0861
0.274	0.339	0.496	0.498	0.251	0.274	0.428	0.0874
0.275	0.339	0.496	0.499	0.252	0.275	0.428	0.0876
0.275	0.341	0.498	0.5	0.252	0.276	0.429	0.0881
0.276	0.341	0.499	0.5	0.253	0.276	0.429	0.0884
0.276	0.341	0.499	0.5	0.253	0.276	0.43	0.0892
0.276	0.342	0.499	0.501	0.254	0.276	0.432	0.0917
0.277	0.343	0.499	0.501	0.254	0.276	0.432	0.0918
0.278	0.343	0.499	0.502	0.256	0.276	0.434	0.0923
0.28	0.345	0.499	0.502	0.257	0.276	0.434	0.0925
0.283	0.345	0.5	0.503	0.259	0.277	0.435	0.0935
0.285	0.345	0.5	0.503	0.26	0.277	0.436	0.0953
0.288	0.345	0.5	0.504	0.261	0.278	0.436	0.0963
0.289	0.345	0.501	0.505	0.264	0.278	0.438	0.0966
0.29	0.346	0.501	0.509	0.264	0.281	0.438	0.0996
0.292	0.346	0.501	0.512	0.264	0.281	0.438	0.1
0.292	0.347	0.501	0.512	0.264	0.282	0.44	0.102
0.293	0.35	0.502	0.512	0.265	0.283	0.442	0.102
0.294	0.351	0.502	0.512	0.266	0.284	0.443	0.102
0.296	0.351	0.502	0.513	0.267	0.284	0.444	0.103
0.296	0.355	0.502	0.515	0.267	0.284	0.451	0.104
0.296	0.357	0.503	0.516	0.267	0.285	0.451	0.106
0.297	0.359	0.503	0.518	0.268	0.286	0.452	0.106
0.297	0.359	0.503	0.519	0.268	0.286	0.452	0.109
0.297	0.36	0.503	0.519	0.268	0.286	0.452	0.112
0.297	0.36	0.504	0.522	0.269	0.286	0.452	0.112
0.3	0.361	0.504	0.523	0.269	0.287	0.453	0.113
0.301	0.361	0.505	0.523	0.269	0.288	0.454	0.113
0.302	0.365	0.505	0.524	0.269	0.288	0.454	0.117
0.302	0.365	0.506	0.524	0.27	0.289	0.455	0.117
0.302	0.366	0.506	0.524	0.27	0.289	0.456	0.117
0.303	0.366	0.506	0.524	0.271	0.29	0.457	0.119
0.304	0.367	0.508	0.526	0.271	0.29	0.458	0.12
0.305	0.367	0.508	0.526	0.273	0.29	0.459	0.125
0.305	0.369	0.508	0.527	0.273	0.29	0.459	0.125
0.306	0.369	0.508	0.528	0.274	0.292	0.46	0.129
0.309	0.369	0.509	0.528	0.275	0.293	0.461	0.138
0.309	0.37	0.509	0.528	0.275	0.293	0.461	0.151
0.31	0.374	0.509	0.528	0.277	0.294	0.462	0.151
0.31	0.374	0.509	0.529	0.278	0.295	0.463	0.154
0.313	0.375	0.509	0.53	0.279	0.295	0.463	0.155
0.313	0.375	0.51	0.53	0.281	0.297	0.464	0.159
0.313	0.376	0.51	0.53	0.281	0.297	0.465	0.162
0.315	0.377	0.51	0.53	0.281	0.298	0.466	0.166
0.316	0.377	0.51	0.531	0.284	0.299	0.47	0.179
0.317	0.378	0.51	0.531	0.285	0.299	0.47	0.184
0.319	0.379	0.511	0.532	0.286	0.3	0.471	0.194
0.32	0.379	0.511	0.532	0.286	0.301	0.471	0.197
0.321	0.381	0.512	0.532	0.286	0.301	0.472	0.198
0.324	0.381	0.514	0.533	0.287	0.301	0.474	0.2
0.325	0.382	0.514	0.534	0.288	0.302	0.474	0.204
0.326	0.385	0.515	0.534	0.288	0.302	0.478	0.207
0.327	0.385	0.515	0.537	0.289	0.302	0.479	0.211
0.331	0.385	0.515	0.537	0.289	0.303	0.48	0.222
0.332	0.385	0.516	0.538	0.289	0.303	0.481	0.225
0.332	0.387	0.516	0.541	0.289	0.303	0.481	0.226
0.334	0.39	0.516	0.542	0.291	0.304	0.481	0.235
0.335	0.392	0.516	0.542	0.292	0.305	0.482	0.237
0.335	0.392	0.516	0.543	0.292	0.305	0.484	0.237
0.335	0.392	0.517	0.543	0.292	0.306	0.484	0.237
0.337	0.392	0.517	0.545	0.292	0.306	0.485	0.244
0.337	0.393	0.519	0.545	0.293	0.308	0.485	0.245
0.338	0.394	0.519	0.545	0.294	0.308	0.485	0.255
0.339	0.395	0.519	0.546	0.294	0.308	0.485	0.256
0.34	0.397	0.519	0.546	0.294	0.309	0.486	0.257
0.34	0.397	0.519	0.547	0.294	0.309	0.486	0.258
0.342	0.398	0.519	0.548	0.294	0.309	0.486	0.26
0.343	0.4	0.519	0.548	0.294	0.309	0.486	0.263
0.343	0.4	0.52	0.548	0.294	0.309	0.486	0.277
0.343	0.401	0.52	0.548	0.296	0.309	0.486	0.279
0.344	0.403	0.521	0.548	0.296	0.31	0.486	0.289
0.344	0.403	0.522	0.551	0.296	0.31	0.487	0.29
0.344	0.404	0.522	0.552	0.296	0.31	0.489	0.29
0.345	0.405	0.522	0.552	0.297	0.311	0.489	0.293
0.345	0.406	0.522	0.553	0.297	0.311	0.489	0.293
0.346	0.406	0.523	0.553	0.297	0.314	0.489	0.296
0.347	0.407	0.523	0.554	0.298	0.314	0.49	0.298
0.347	0.409	0.523	0.554	0.298	0.314	0.491	0.31
0.349	0.409	0.524	0.554	0.298	0.317	0.493	0.311
0.35	0.41	0.524	0.555	0.298	0.317	0.495	0.314
0.351	0.411	0.524	0.556	0.299	0.317	0.495	0.315
0.352	0.411	0.525	0.556	0.3	0.318	0.495	0.319
0.352	0.415	0.525	0.556	0.3	0.318	0.496	0.321
0.354	0.415	0.526	0.557	0.3	0.318	0.496	0.322
0.354	0.415	0.526	0.557	0.3	0.318	0.498	0.323
0.354	0.416	0.526	0.557	0.301	0.318	0.498	0.327
0.354	0.416	0.526	0.557	0.301	0.319	0.501	0.335
0.355	0.418	0.527	0.558	0.301	0.32	0.501	0.34
0.355	0.418	0.527	0.558	0.301	0.32	0.502	0.342
0.356	0.418	0.527	0.558	0.302	0.32	0.502	0.342
0.359	0.419	0.528	0.559	0.303	0.32	0.503	0.343
0.36	0.42	0.528	0.559	0.303	0.321	0.503	0.344
0.361	0.42	0.528	0.56	0.303	0.321	0.503	0.354
0.362	0.422	0.529	0.56	0.304	0.322	0.503	0.357
0.363	0.424	0.529	0.56	0.304	0.323	0.505	0.36
0.364	0.425	0.53	0.56	0.304	0.323	0.506	0.361
0.364	0.425	0.53	0.561	0.304	0.323	0.506	0.361
0.366	0.425	0.53	0.562	0.305	0.323	0.507	0.362
0.367	0.426	0.53	0.562	0.305	0.324	0.507	0.365
0.369	0.426	0.531	0.562	0.306	0.324	0.508	0.368
0.369	0.427	0.531	0.563	0.306	0.324	0.508	0.369
0.369	0.427	0.531	0.564	0.307	0.324	0.508	0.37
0.37	0.427	0.531	0.564	0.307	0.325	0.509	0.37
0.372	0.427	0.532	0.566	0.308	0.325	0.509	0.371
0.375	0.428	0.532	0.566	0.308	0.326	0.509	0.373
0.377	0.428	0.532	0.566	0.308	0.327	0.51	0.374
0.377	0.429	0.533	0.568	0.308	0.328	0.51	0.374
0.378	0.429	0.533	0.568	0.309	0.328	0.51	0.376
0.378	0.429	0.533	0.569	0.309	0.328	0.51	0.378
0.379	0.43	0.533	0.569	0.311	0.329	0.511	0.38
0.382	0.431	0.534	0.569	0.311	0.329	0.514	0.381
0.382	0.432	0.535	0.569	0.312	0.329	0.514	0.382
0.385	0.432	0.535	0.57	0.312	0.33	0.514	0.382
0.385	0.434	0.535	0.57	0.313	0.331	0.515	0.383
0.385	0.434	0.536	0.57	0.313	0.332	0.515	0.386
0.385	0.434	0.536	0.571	0.314	0.333	0.516	0.387
0.386	0.435	0.537	0.572	0.314	0.334	0.517	0.39
0.387	0.435	0.537	0.572	0.314	0.335	0.517	0.393
0.389	0.436	0.538	0.572	0.314	0.336	0.517	0.397
0.392	0.436	0.538	0.573	0.314	0.336	0.518	0.399
0.392	0.436	0.538	0.573	0.314	0.337	0.519	0.399
0.395	0.437	0.538	0.573	0.316	0.338	0.52	0.4
0.395	0.438	0.539	0.573	0.317	0.339	0.52	0.404
0.396	0.439	0.539	0.573	0.318	0.339	0.521	0.405
0.397	0.439	0.539	0.574	0.318	0.341	0.521	0.406
0.399	0.44	0.539	0.574	0.318	0.343	0.521	0.406
0.403	0.44	0.539	0.574	0.319	0.343	0.521	0.406
0.404	0.44	0.54	0.575	0.32	0.343	0.523	0.406
0.405	0.441	0.54	0.575	0.32	0.343	0.523	0.409
0.405	0.441	0.54	0.576	0.32	0.344	0.523	0.409
0.407	0.441	0.54	0.576	0.321	0.344	0.523	0.41
0.407	0.442	0.541	0.576	0.321	0.344	0.524	0.41
0.41	0.442	0.541	0.576	0.321	0.344	0.525	0.412
0.41	0.442	0.542	0.577	0.321	0.345	0.525	0.413
0.411	0.443	0.543	0.578	0.321	0.346	0.525	0.414
0.413	0.444	0.544	0.578	0.321	0.346	0.525	0.415
0.413	0.444	0.544	0.578	0.322	0.347	0.526	0.418
0.413	0.445	0.544	0.579	0.322	0.348	0.527	0.42
0.414	0.445	0.545	0.579	0.322	0.348	0.528	0.426
0.415	0.446	0.545	0.579	0.322	0.348	0.528	0.426
0.422	0.447	0.545	0.579	0.323	0.349	0.529	0.428
0.422	0.447	0.546	0.579	0.323	0.349	0.529	0.429
0.423	0.448	0.546	0.58	0.323	0.352	0.53	0.431
0.424	0.45	0.546	0.58	0.323	0.353	0.53	0.432
0.426	0.451	0.546	0.58	0.324	0.354	0.533	0.432
0.426	0.451	0.546	0.581	0.326	0.356	0.533	0.432
0.432	0.452	0.547	0.582	0.327	0.357	0.535	0.433
0.432	0.453	0.547	0.582	0.327	0.357	0.535	0.434
0.435	0.453	0.547	0.583	0.327	0.358	0.536	0.435
0.441	0.453	0.547	0.583	0.33	0.358	0.536	0.435
0.443	0.453	0.548	0.584	0.334	0.358	0.536	0.438
0.446	0.454	0.548	0.584	0.334	0.359	0.536	0.438
0.447	0.454	0.548	0.586	0.334	0.359	0.536	0.441
0.447	0.455	0.549	0.586	0.334	0.359	0.537	0.444
0.447	0.456	0.549	0.586	0.337	0.359	0.537	0.447
0.453	0.456	0.549	0.586	0.337	0.36	0.537	0.449
0.457	0.456	0.549	0.586	0.338	0.36	0.538	0.45
0.458	0.458	0.549	0.586	0.338	0.36	0.538	0.45
0.459	0.459	0.549	0.587	0.339	0.361	0.539	0.451
0.466	0.459	0.549	0.587	0.339	0.362	0.539	0.452
0.466	0.461	0.549	0.587	0.339	0.362	0.539	0.453
0.467	0.463	0.549	0.588	0.34	0.363	0.54	0.453
0.471	0.464	0.55	0.588	0.34	0.363	0.54	0.454
0.479	0.465	0.55	0.588	0.34	0.363	0.54	0.455
0.483	0.465	0.55	0.589	0.34	0.363	0.54	0.456
0.485	0.466	0.55	0.589	0.34	0.363	0.54	0.457
0.486	0.466	0.55	0.59	0.34	0.364	0.54	0.458
0.486	0.467	0.55	0.59	0.341	0.364	0.541	0.459
0.488	0.467	0.551	0.59	0.341	0.365	0.541	0.462
0.493	0.469	0.552	0.59	0.341	0.365	0.541	0.464
0.499	0.47	0.552	0.59	0.341	0.368	0.541	0.466
0.508	0.473	0.553	0.59	0.341	0.368	0.542	0.467
0.509	0.476	0.553	0.591	0.341	0.368	0.542	0.467
0.515	0.477	0.553	0.591	0.341	0.369	0.542	0.467
0.53	0.478	0.553	0.592	0.342	0.37	0.542	0.468
0.531	0.479	0.554	0.593	0.343	0.37	0.543	0.469
0.543	0.479	0.554	0.594	0.344	0.371	0.543	0.47
0.543	0.481	0.555	0.594	0.345	0.372	0.544	0.47
0.55	0.481	0.555	0.594	0.345	0.374	0.544	0.472
0.55	0.482	0.555	0.594	0.346	0.374	0.544	0.472
0.559	0.484	0.555	0.595	0.346	0.375	0.545	0.473
0.573	0.484	0.555	0.595	0.347	0.376	0.545	0.473
0.578	0.485	0.556	0.595	0.347	0.379	0.546	0.474
0.578	0.487	0.556	0.596	0.348	0.379	0.546	0.474
0.587	0.487	0.557	0.597	0.349	0.379	0.546	0.475
0.614	0.489	0.557	0.597	0.349	0.38	0.546	0.475
0.652	0.491	0.557	0.598	0.349	0.382	0.546	0.475
0.743	0.491	0.557	0.599	0.351	0.382	0.547	0.477
0.752	0.492	0.557	0.599	0.351	0.382	0.547	0.478
	0.492	0.557	0.599	0.352	0.382	0.548	0.478
	0.493	0.558	0.6	0.352	0.383	0.548	0.479
	0.493	0.558	0.6	0.352	0.384	0.548	0.479
	0.494	0.558	0.601	0.352	0.384	0.548	0.48
	0.496	0.558	0.602	0.352	0.384	0.549	0.48
	0.496	0.558	0.603	0.352	0.385	0.549	0.48
	0.497	0.558	0.603	0.354	0.387	0.55	0.481
	0.498	0.559	0.603	0.354	0.387	0.55	0.481
	0.501	0.559	0.604	0.355	0.388	0.55	0.481
	0.502	0.559	0.604	0.357	0.389	0.551	0.482
	0.504	0.559	0.604	0.357	0.39	0.552	0.482
	0.505	0.559	0.604	0.359	0.39	0.553	0.484
	0.505	0.559	0.604	0.359	0.391	0.554	0.484
	0.506	0.56	0.604	0.36	0.392	0.555	0.484
	0.507	0.56	0.605	0.361	0.392	0.555	0.484
	0.507	0.561	0.605	0.361	0.393	0.556	0.485
	0.511	0.561	0.605	0.361	0.393	0.556	0.488
	0.512	0.561	0.605	0.362	0.396	0.556	0.491
	0.514	0.561	0.605	0.363	0.396	0.557	0.492
	0.515	0.561	0.606	0.364	0.396	0.557	0.493
	0.518	0.561	0.606	0.364	0.396	0.558	0.493
	0.518	0.561	0.606	0.365	0.397	0.558	0.494
	0.521	0.561	0.607	0.365	0.398	0.558	0.494
	0.522	0.562	0.607	0.365	0.399	0.559	0.496
	0.523	0.562	0.607	0.366	0.399	0.56	0.496
	0.523	0.562	0.607	0.368	0.399	0.56	0.497
	0.523	0.562	0.607	0.369	0.399	0.561	0.497
	0.524	0.563	0.607	0.37	0.399	0.561	0.498
	0.527	0.563	0.608	0.372	0.399	0.561	0.498
	0.533	0.563	0.608	0.372	0.4	0.561	0.498
	0.535	0.563	0.608	0.372	0.4	0.562	0.499
	0.539	0.563	0.608	0.372	0.401	0.563	0.5
	0.54	0.564	0.609	0.372	0.402	0.563	0.501
	0.542	0.564	0.609	0.374	0.402	0.564	0.501
	0.545	0.564	0.609	0.374	0.403	0.564	0.501
	0.553	0.565	0.61	0.375	0.403	0.565	0.502
	0.554	0.565	0.61	0.376	0.403	0.565	0.503
	0.56	0.565	0.61	0.376	0.404	0.565	0.504
	0.56	0.566	0.611	0.377	0.405	0.566	0.507
	0.562	0.566	0.611	0.377	0.405	0.566	0.507
	0.566	0.567	0.611	0.378	0.406	0.566	0.508
	0.568	0.567	0.611	0.379	0.406	0.566	0.509
	0.569	0.567	0.612	0.379	0.406	0.566	0.509
	0.57	0.568	0.612	0.379	0.406	0.567	0.511
	0.572	0.568	0.612	0.38	0.407	0.567	0.511
	0.574	0.568	0.612	0.381	0.408	0.567	0.511
	0.577	0.568	0.612	0.381	0.408	0.568	0.513
	0.578	0.569	0.612	0.382	0.409	0.568	0.513
	0.578	0.569	0.613	0.383	0.409	0.568	0.514
	0.58	0.569	0.613	0.383	0.41	0.569	0.514
	0.581	0.569	0.613	0.383	0.41	0.57	0.516
	0.582	0.569	0.613	0.384	0.41	0.57	0.516
	0.583	0.57	0.614	0.384	0.412	0.571	0.516
	0.589	0.57	0.614	0.387	0.412	0.571	0.517
	0.592	0.57	0.614	0.388	0.413	0.571	0.517
	0.596	0.571	0.615	0.391	0.414	0.572	0.518
	0.599	0.571	0.616	0.392	0.414	0.572	0.518
	0.6	0.571	0.616	0.393	0.414	0.572	0.519
	0.604	0.571	0.616	0.393	0.416	0.572	0.519
	0.608	0.571	0.617	0.394	0.418	0.572	0.52
	0.609	0.572	0.617	0.394	0.421	0.574	0.521
	0.616	0.572	0.617	0.395	0.421	0.574	0.522
	0.628	0.572	0.619	0.395	0.422	0.574	0.522
	0.644	0.572	0.619	0.396	0.422	0.575	0.522
	0.655	0.572	0.62	0.396	0.422	0.575	0.523
	0.661	0.572	0.62	0.397	0.423	0.575	0.523
	0.669	0.572	0.621	0.397	0.424	0.575	0.523
	0.68	0.572	0.621	0.397	0.426	0.576	0.524
	0.702	0.573	0.621	0.397	0.426	0.576	0.525
	0.711	0.573	0.622	0.398	0.427	0.577	0.526
	0.738	0.573	0.623	0.4	0.427	0.577	0.526
	0.765	0.573	0.623	0.401	0.427	0.577	0.526
	0.843	0.573	0.624	0.401	0.428	0.578	0.527
		0.574	0.624	0.401	0.428	0.578	0.527
		0.574	0.624	0.402	0.429	0.578	0.528
		0.574	0.625	0.404	0.43	0.578	0.529
		0.574	0.625	0.405	0.43	0.579	0.532
		0.575	0.626	0.407	0.43	0.579	0.532
		0.575	0.626	0.407	0.43	0.579	0.533
		0.575	0.627	0.409	0.43	0.579	0.534
		0.575	0.628	0.409	0.432	0.58	0.534
		0.575	0.628	0.41	0.433	0.58	0.535
		0.575	0.628	0.411	0.435	0.58	0.535
		0.577	0.628	0.411	0.438	0.58	0.535
		0.577	0.628	0.414	0.44	0.58	0.536
		0.577	0.629	0.414	0.443	0.581	0.537
		0.577	0.629	0.415	0.444	0.581	0.538
		0.577	0.63	0.418	0.444	0.582	0.538
		0.577	0.63	0.418	0.446	0.582	0.538
		0.577	0.63	0.421	0.448	0.582	0.539
		0.577	0.63	0.421	0.45	0.582	0.54
		0.578	0.631	0.422	0.451	0.583	0.54
		0.578	0.632	0.423	0.453	0.585	0.54
		0.578	0.633	0.426	0.453	0.585	0.54
		0.578	0.634	0.427	0.455	0.585	0.541
		0.579	0.634	0.427	0.455	0.587	0.541
		0.579	0.635	0.427	0.455	0.587	0.541
		0.579	0.635	0.429	0.456	0.587	0.542
		0.579	0.635	0.429	0.457	0.587	0.542
		0.58	0.636	0.429	0.458	0.587	0.542
		0.58	0.636	0.43	0.46	0.587	0.544
		0.58	0.637	0.434	0.465	0.588	0.544
		0.58	0.637	0.435	0.466	0.588	0.544
		0.58	0.637	0.435	0.467	0.588	0.544
		0.58	0.637	0.435	0.467	0.588	0.545
		0.58	0.637	0.435	0.469	0.588	0.545
		0.581	0.638	0.439	0.472	0.589	0.545
		0.581	0.639	0.442	0.474	0.589	0.546
		0.581	0.639	0.444	0.475	0.589	0.546
		0.582	0.64	0.447	0.477	0.589	0.546
		0.582	0.64	0.447	0.48	0.59	0.547
		0.582	0.641	0.448	0.48	0.59	0.547
		0.582	0.642	0.448	0.485	0.59	0.547
		0.583	0.642	0.448	0.486	0.59	0.547
		0.583	0.643	0.449	0.489	0.59	0.547
		0.584	0.643	0.45	0.489	0.591	0.549
		0.584	0.644	0.451	0.492	0.591	0.549
		0.584	0.644	0.452	0.495	0.591	0.55
		0.584	0.645	0.452	0.497	0.592	0.55
		0.585	0.645	0.452	0.5	0.592	0.551
		0.585	0.645	0.453	0.501	0.592	0.552
		0.585	0.645	0.458	0.503	0.592	0.553
		0.585	0.645	0.46	0.505	0.593	0.553
		0.585	0.646	0.461	0.512	0.593	0.554
		0.585	0.646	0.463	0.514	0.593	0.554
		0.586	0.647	0.463	0.514	0.593	0.554
		0.586	0.647	0.47	0.524	0.593	0.555
		0.586	0.647	0.472	0.526	0.593	0.555
		0.586	0.647	0.472	0.543	0.593	0.555
		0.586	0.648	0.473	0.543	0.594	0.556
		0.587	0.648	0.473	0.549	0.594	0.556
		0.587	0.648	0.474	0.56	0.594	0.556
		0.587	0.649	0.477	0.573	0.594	0.557
		0.587	0.65	0.477	0.579	0.594	0.557
		0.587	0.65	0.478	0.588	0.595	0.557
		0.587	0.65	0.479	0.63	0.595	0.557
		0.587	0.651	0.486	0.64	0.595	0.56
		0.587	0.652	0.493		0.596	0.56
		0.588	0.653	0.495		0.596	0.56
		0.588	0.654	0.499		0.597	0.56
		0.588	0.654	0.5		0.597	0.56
		0.588	0.655	0.512		0.597	0.561
		0.588	0.655	0.513		0.598	0.561
		0.588	0.655	0.519		0.598	0.561
		0.588	0.656	0.532		0.598	0.563
		0.588	0.656	0.541		0.598	0.563
		0.589	0.657	0.544		0.599	0.564
		0.59	0.657	0.549		0.599	0.564
		0.59	0.657	0.55		0.599	0.564
		0.59	0.657	0.56		0.599	0.565
		0.59	0.657	0.561		0.599	0.565
		0.59	0.657	0.562		0.6	0.566
		0.59	0.657	0.567		0.6	0.567
		0.591	0.658	0.573		0.6	0.567
		0.591	0.659	0.583		0.601	0.567
		0.591	0.659	0.588		0.601	0.568
		0.591	0.659	0.593		0.601	0.568
		0.591	0.66	0.598		0.602	0.568
		0.591	0.66	0.613		0.602	0.568
		0.591	0.66	0.639		0.603	0.568
		0.592	0.662	0.64		0.603	0.568
		0.592	0.662	0.645		0.603	0.569
		0.592	0.662	0.662		0.603	0.569
		0.592	0.663	0.676		0.604	0.569
		0.592	0.663	0.694		0.604	0.569
		0.593	0.663			0.604	0.569
		0.593	0.663			0.604	0.57
		0.593	0.664			0.606	0.571
		0.593	0.665			0.606	0.572
		0.593	0.665			0.606	0.572
		0.593	0.665			0.607	0.573
		0.593	0.665			0.607	0.573
		0.594	0.667			0.608	0.573
		0.595	0.667			0.608	0.574
		0.595	0.669			0.608	0.574
		0.595	0.669			0.608	0.574
		0.595	0.669			0.608	0.574
		0.595	0.67			0.608	0.575
		0.595	0.67			0.609	0.575
		0.596	0.671			0.609	0.575
		0.596	0.671			0.609	0.576
		0.596	0.672			0.61	0.577
		0.596	0.672			0.61	0.577
		0.597	0.672			0.61	0.577
		0.597	0.672			0.611	0.577
		0.598	0.673			0.611	0.578
		0.598	0.674			0.611	0.578
		0.598	0.675			0.612	0.578
		0.598	0.675			0.612	0.579
		0.598	0.675			0.612	0.579
		0.599	0.676			0.612	0.582
		0.599	0.676			0.612	0.582
		0.599	0.677			0.612	0.583
		0.599	0.677			0.613	0.583
		0.599	0.677			0.614	0.585
		0.6	0.678			0.614	0.586
		0.6	0.678			0.615	0.586
		0.6	0.678			0.615	0.587
		0.6	0.678			0.615	0.588
		0.6	0.679			0.615	0.588
		0.6	0.679			0.616	0.588
		0.6	0.679			0.616	0.589
		0.6	0.68			0.616	0.589
		0.601	0.68			0.617	0.589
		0.601	0.68			0.617	0.59
		0.601	0.68			0.617	0.59
		0.602	0.681			0.618	0.591
		0.602	0.681			0.618	0.591
		0.602	0.682			0.618	0.591
		0.602	0.682			0.619	0.591
		0.602	0.682			0.619	0.592
		0.602	0.683			0.619	0.592
		0.602	0.684			0.619	0.592
		0.602	0.684			0.619	0.593
		0.602	0.684			0.619	0.593
		0.602	0.686			0.62	0.593
		0.603	0.686			0.62	0.593
		0.603	0.687			0.621	0.593
		0.603	0.687			0.621	0.594
		0.603	0.687			0.622	0.594
		0.603	0.687			0.622	0.596
		0.603	0.688			0.622	0.596
		0.604	0.688			0.622	0.596
		0.604	0.688			0.623	0.597
		0.605	0.688			0.623	0.598
		0.605	0.689			0.623	0.598
		0.605	0.689			0.623	0.598
		0.605	0.689			0.623	0.599
		0.605	0.69			0.624	0.599
		0.605	0.69			0.624	0.6
		0.605	0.691			0.624	0.6
		0.605	0.691			0.624	0.6
		0.606	0.691			0.625	0.6
		0.606	0.691			0.625	0.6
		0.606	0.691			0.625	0.6
		0.606	0.691			0.626	0.6
		0.606	0.692			0.626	0.601
		0.606	0.692			0.626	0.601
		0.606	0.692			0.626	0.601
		0.606	0.692			0.626	0.602
		0.606	0.693			0.627	0.602
		0.606	0.693			0.627	0.602
		0.606	0.693			0.628	0.602
		0.607	0.694			0.629	0.602
		0.607	0.694			0.629	0.602
		0.607	0.694			0.629	0.603
		0.607	0.695			0.629	0.603
		0.607	0.695			0.63	0.604
		0.608	0.695			0.63	0.604
		0.608	0.696			0.63	0.604
		0.608	0.696			0.63	0.604
		0.608	0.696			0.63	0.605
		0.608	0.697			0.63	0.605
		0.608	0.697			0.631	0.605
		0.608	0.698			0.631	0.605
		0.608	0.698			0.631	0.605
		0.609	0.699			0.632	0.605
		0.609	0.699			0.632	0.606
		0.609	0.699			0.632	0.606
		0.609	0.7			0.633	0.606
		0.609	0.701			0.633	0.607
		0.609	0.701			0.633	0.607
		0.609	0.701			0.634	0.608
		0.61	0.702			0.634	0.608
		0.61	0.702			0.634	0.609
		0.61	0.702			0.634	0.609
		0.61	0.703			0.635	0.61
		0.61	0.703			0.635	0.61
		0.611	0.704			0.636	0.61
		0.611	0.705			0.636	0.61
		0.611	0.705			0.636	0.611
		0.611	0.706			0.636	0.611
		0.611	0.706			0.636	0.611
		0.612	0.707			0.637	0.611
		0.612	0.707			0.637	0.612
		0.612	0.707			0.638	0.612
		0.612	0.707			0.638	0.613
		0.612	0.708			0.638	0.614
		0.612	0.708			0.638	0.614
		0.613	0.709			0.638	0.615
		0.613	0.709			0.639	0.615
		0.613	0.709			0.639	0.615
		0.613	0.709			0.64	0.615
		0.613	0.709			0.64	0.615
		0.613	0.709			0.641	0.615
		0.613	0.709			0.641	0.615
		0.613	0.71			0.641	0.616
		0.613	0.711			0.641	0.617
		0.613	0.711			0.641	0.617
		0.614	0.711			0.641	0.617
		0.614	0.711			0.641	0.618
		0.614	0.712			0.641	0.618
		0.614	0.713			0.642	0.618
		0.614	0.713			0.642	0.619
		0.615	0.713			0.643	0.619
		0.615	0.714			0.643	0.62
		0.615	0.714			0.644	0.62
		0.615	0.714			0.644	0.62
		0.615	0.715			0.644	0.621
		0.615	0.715			0.644	0.621
		0.615	0.715			0.644	0.621
		0.616	0.715			0.644	0.621
		0.616	0.716			0.644	0.622
		0.616	0.716			0.645	0.622
		0.616	0.716			0.645	0.622
		0.616	0.717			0.645	0.622
		0.616	0.717			0.645	0.623
		0.617	0.717			0.645	0.623
		0.617	0.717			0.645	0.623
		0.617	0.718			0.645	0.623
		0.618	0.719			0.646	0.624
		0.618	0.719			0.646	0.624
		0.618	0.72			0.647	0.624
		0.618	0.72			0.648	0.624
		0.618	0.72			0.648	0.624
		0.618	0.721			0.648	0.624
		0.618	0.721			0.648	0.625
		0.618	0.722			0.649	0.625
		0.618	0.722			0.649	0.625
		0.619	0.723			0.65	0.625
		0.619	0.724			0.65	0.626
		0.619	0.724			0.65	0.626
		0.619	0.724			0.651	0.626
		0.619	0.725			0.651	0.626
		0.619	0.726			0.651	0.627
		0.619	0.726			0.651	0.627
		0.62	0.726			0.651	0.627
		0.62	0.727			0.651	0.627
		0.62	0.728			0.651	0.627
		0.62	0.729			0.651	0.627
		0.62	0.729			0.651	0.628
		0.62	0.729			0.651	0.629
		0.62	0.729			0.652	0.629
		0.621	0.73			0.652	0.629
		0.621	0.73			0.652	0.629
		0.621	0.73			0.652	0.629
		0.621	0.731			0.652	0.629
		0.621	0.732			0.653	0.63
		0.621	0.732			0.653	0.63
		0.622	0.732			0.653	0.631
		0.622	0.733			0.653	0.631
		0.622	0.733			0.654	0.631
		0.622	0.733			0.654	0.631
		0.622	0.734			0.654	0.631
		0.622	0.734			0.655	0.632
		0.622	0.734			0.655	0.632
		0.622	0.735			0.655	0.632
		0.623	0.735			0.655	0.633
		0.623	0.735			0.657	0.635
		0.623	0.735			0.657	0.635
		0.623	0.735			0.657	0.636
		0.623	0.735			0.657	0.636
		0.623	0.735			0.657	0.637
		0.623	0.735			0.657	0.638
		0.624	0.737			0.657	0.638
		0.624	0.737			0.657	0.638
		0.624	0.738			0.657	0.638
		0.624	0.738			0.657	0.638
		0.625	0.738			0.658	0.638
		0.625	0.738			0.658	0.639
		0.625	0.738			0.658	0.639
		0.625	0.738			0.658	0.64
		0.625	0.739			0.658	0.64
		0.625	0.739			0.658	0.64
		0.625	0.74			0.659	0.64
		0.625	0.74			0.659	0.64
		0.625	0.741			0.659	0.64
		0.625	0.741			0.659	0.641
		0.625	0.742			0.659	0.641
		0.625	0.742			0.659	0.641
		0.626	0.742			0.66	0.642
		0.626	0.742			0.66	0.642
		0.626	0.743			0.66	0.642
		0.626	0.744			0.66	0.642
		0.626	0.744			0.66	0.642
		0.626	0.744			0.66	0.643
		0.626	0.744			0.661	0.643
		0.627	0.745			0.661	0.643
		0.627	0.745			0.662	0.644
		0.627	0.746			0.662	0.644
		0.627	0.746			0.662	0.644
		0.627	0.746			0.662	0.645
		0.627	0.746			0.662	0.645
		0.627	0.747			0.663	0.645
		0.628	0.747			0.663	0.645
		0.628	0.747			0.663	0.646
		0.628	0.747			0.664	0.646
		0.628	0.75			0.664	0.646
		0.629	0.751			0.664	0.646
		0.629	0.751			0.664	0.646
		0.629	0.751			0.665	0.647
		0.629	0.752			0.665	0.647
		0.629	0.753			0.665	0.647
		0.629	0.753			0.666	0.648
		0.629	0.754			0.666	0.648
		0.63	0.755			0.666	0.649
		0.63	0.755			0.667	0.649
		0.63	0.756			0.668	0.649
		0.63	0.757			0.668	0.649
		0.63	0.758			0.668	0.65
		0.63	0.759			0.668	0.65
		0.63	0.759			0.668	0.651
		0.63	0.759			0.668	0.651
		0.631	0.761			0.668	0.652
		0.631	0.761			0.669	0.652
		0.632	0.761			0.669	0.652
		0.632	0.762			0.669	0.652
		0.632	0.762			0.669	0.652
		0.632	0.762			0.669	0.652
		0.632	0.762			0.67	0.652
		0.632	0.763			0.67	0.653
		0.632	0.763			0.67	0.653
		0.632	0.763			0.67	0.653
		0.633	0.764			0.67	0.653
		0.633	0.765			0.671	0.653
		0.633	0.766			0.671	0.654
		0.633	0.766			0.671	0.654
		0.633	0.767			0.671	0.654
		0.633	0.768			0.671	0.654
		0.633	0.769			0.671	0.655
		0.633	0.769			0.671	0.655
		0.634	0.769			0.672	0.655
		0.634	0.769			0.672	0.655
		0.634	0.769			0.672	0.655
		0.634	0.77			0.673	0.655
		0.634	0.77			0.673	0.655
		0.634	0.77			0.673	0.656
		0.635	0.77			0.673	0.656
		0.635	0.771			0.674	0.656
		0.635	0.771			0.674	0.656
		0.635	0.771			0.674	0.657
		0.635	0.771			0.675	0.657
		0.635	0.772			0.675	0.657
		0.635	0.772			0.675	0.658
		0.635	0.774			0.676	0.659
		0.636	0.774			0.676	0.659
		0.636	0.775			0.676	0.659
		0.636	0.775			0.677	0.659
		0.636	0.775			0.677	0.659
		0.636	0.775			0.677	0.66
		0.636	0.775			0.677	0.66
		0.636	0.777			0.677	0.66
		0.636	0.777			0.677	0.66
		0.637	0.777			0.677	0.661
		0.637	0.778			0.677	0.661
		0.637	0.778			0.677	0.661
		0.637	0.778			0.678	0.661
		0.637	0.778			0.678	0.662
		0.637	0.779			0.678	0.662
		0.637	0.779			0.678	0.662
		0.638	0.779			0.678	0.662
		0.638	0.779			0.679	0.662
		0.638	0.78			0.679	0.663
		0.638	0.78			0.679	0.663
		0.638	0.781			0.679	0.663
		0.638	0.782			0.679	0.664
		0.639	0.782			0.679	0.664
		0.639	0.782			0.679	0.664
		0.639	0.783			0.68	0.664
		0.639	0.783			0.68	0.664
		0.639	0.784			0.68	0.664
		0.639	0.784			0.68	0.664
		0.639	0.784			0.68	0.665
		0.639	0.784			0.68	0.665
		0.639	0.785			0.68	0.665
		0.639	0.786			0.681	0.665
		0.639	0.786			0.681	0.665
		0.64	0.786			0.681	0.667
		0.64	0.786			0.681	0.667
		0.64	0.787			0.681	0.667
		0.64	0.787			0.681	0.667
		0.64	0.787			0.682	0.668
		0.64	0.787			0.682	0.669
		0.64	0.788			0.682	0.669
		0.64	0.788			0.682	0.669
		0.64	0.789			0.683	0.669
		0.641	0.789			0.683	0.67
		0.641	0.79			0.683	0.67
		0.641	0.791			0.683	0.67
		0.641	0.792			0.684	0.67
		0.641	0.792			0.684	0.671
		0.641	0.792			0.684	0.671
		0.641	0.792			0.684	0.671
		0.641	0.793			0.684	0.672
		0.641	0.793			0.684	0.672
		0.642	0.793			0.685	0.672
		0.642	0.793			0.685	0.673
		0.642	0.793			0.685	0.673
		0.642	0.793			0.685	0.673
		0.642	0.793			0.685	0.673
		0.643	0.794			0.685	0.673
		0.643	0.794			0.686	0.674
		0.643	0.794			0.686	0.674
		0.643	0.795			0.686	0.674
		0.643	0.795			0.686	0.674
		0.644	0.796			0.686	0.674
		0.644	0.797			0.686	0.674
		0.644	0.798			0.686	0.674
		0.644	0.799			0.686	0.674
		0.644	0.799			0.686	0.675
		0.644	0.799			0.687	0.675
		0.645	0.8			0.687	0.675
		0.645	0.801			0.688	0.675
		0.645	0.801			0.688	0.675
		0.645	0.801			0.688	0.675
		0.645	0.802			0.689	0.676
		0.645	0.802			0.689	0.676
		0.645	0.803			0.689	0.676
		0.645	0.803			0.689	0.676
		0.645	0.803			0.69	0.676
		0.646	0.803			0.69	0.677
		0.646	0.803			0.69	0.677
		0.646	0.806			0.69	0.677
		0.646	0.806			0.69	0.677
		0.646	0.807			0.691	0.677
		0.646	0.807			0.691	0.678
		0.646	0.807			0.691	0.678
		0.647	0.807			0.692	0.678
		0.647	0.807			0.692	0.679
		0.647	0.808			0.692	0.679
		0.647	0.809			0.692	0.679
		0.647	0.81			0.692	0.679
		0.647	0.812			0.692	0.679
		0.647	0.814			0.693	0.679
		0.648	0.814			0.694	0.679
		0.648	0.816			0.694	0.68
		0.648	0.816			0.694	0.68
		0.648	0.816			0.694	0.681
		0.648	0.817			0.694	0.681
		0.648	0.82			0.694	0.681
		0.648	0.82			0.694	0.681
		0.649	0.821			0.694	0.681
		0.649	0.821			0.695	0.681
		0.649	0.824			0.695	0.681
		0.649	0.824			0.695	0.682
		0.649	0.824			0.695	0.682
		0.649	0.824			0.696	0.682
		0.65	0.826			0.696	0.682
		0.65	0.826			0.696	0.682
		0.65	0.826			0.696	0.682
		0.65	0.827			0.696	0.682
		0.65	0.828			0.696	0.683
		0.65	0.829			0.696	0.683
		0.65	0.83			0.697	0.684
		0.65	0.83			0.697	0.684
		0.651	0.831			0.697	0.685
		0.651	0.831			0.697	0.685
		0.651	0.831			0.697	0.685
		0.651	0.831			0.697	0.686
		0.651	0.832			0.697	0.686
		0.651	0.832			0.697	0.686
		0.651	0.833			0.697	0.686
		0.651	0.834			0.698	0.687
		0.652	0.835			0.698	0.687
		0.652	0.835			0.698	0.687
		0.652	0.835			0.698	0.688
		0.652	0.836			0.698	0.688
		0.652	0.837			0.698	0.689
		0.652	0.838			0.698	0.689
		0.653	0.838			0.698	0.689
		0.653	0.838			0.699	0.689
		0.653	0.839			0.699	0.689
		0.653	0.84			0.699	0.69
		0.654	0.841			0.699	0.69
		0.654	0.842			0.699	0.69
		0.654	0.842			0.699	0.69
		0.654	0.844			0.699	0.69
		0.654	0.845			0.699	0.69
		0.654	0.847			0.699	0.69
		0.654	0.849			0.7	0.69
		0.655	0.851			0.7	0.69
		0.655	0.851			0.7	0.691
		0.655	0.853			0.7	0.691
		0.655	0.855			0.701	0.691
		0.656	0.86			0.701	0.692
		0.656	0.86			0.701	0.692
		0.656	0.862			0.702	0.692
		0.656	0.862			0.702	0.692
		0.656	0.863			0.702	0.692
		0.656	0.865			0.702	0.693
		0.656	0.867			0.703	0.693
		0.656	0.87			0.703	0.693
		0.657	0.87			0.703	0.693
		0.657	0.871			0.703	0.693
		0.657	0.872			0.703	0.694
		0.657	0.872			0.703	0.694
		0.657	0.872			0.704	0.694
		0.657	0.872			0.704	0.694
		0.658	0.873			0.704	0.694
		0.658	0.874			0.704	0.694
		0.658	0.877			0.705	0.695
		0.658	0.878			0.705	0.695
		0.658	0.878			0.705	0.695
		0.658	0.879			0.706	0.695
		0.658	0.88			0.706	0.696
		0.659	0.881			0.706	0.696
		0.659	0.881			0.706	0.696
		0.659	0.882			0.706	0.696
		0.659	0.883			0.707	0.696
		0.659	0.884			0.707	0.696
		0.659	0.889			0.707	0.696
		0.659	0.89			0.707	0.696
		0.659	0.891			0.707	0.696
		0.66	0.892			0.707	0.696
		0.66	0.892			0.707	0.697
		0.661	0.895			0.707	0.697
		0.661	0.895			0.708	0.697
		0.661	0.896			0.708	0.697
		0.661	0.896			0.708	0.697
		0.661	0.899			0.708	0.697
		0.661	0.9			0.708	0.697
		0.662	0.901			0.708	0.697
		0.662	0.901			0.709	0.697
		0.662	0.903			0.709	0.698
		0.662	0.904			0.71	0.698
		0.662	0.907			0.71	0.698
		0.663	0.909			0.71	0.698
		0.663	0.909			0.71	0.699
		0.663	0.909			0.71	0.699
		0.663	0.912			0.71	0.699
		0.663	0.912			0.71	0.699
		0.663	0.913			0.711	0.699
		0.663	0.914			0.711	0.699
		0.663	0.914			0.711	0.7
		0.663	0.917			0.711	0.7
		0.664	0.917			0.711	0.7
		0.664	0.919			0.711	0.701
		0.664	0.921			0.711	0.701
		0.664	0.922			0.711	0.701
		0.664	0.924			0.712	0.701
		0.664	0.927			0.712	0.701
		0.664	0.928			0.712	0.702
		0.664	0.931			0.712	0.702
		0.665	0.931			0.713	0.702
		0.665	0.934			0.713	0.702
		0.665	0.937			0.713	0.703
		0.665	0.941			0.714	0.703
		0.666	0.944			0.714	0.703
		0.666	0.945			0.714	0.703
		0.666	0.946			0.714	0.704
		0.666	0.947			0.714	0.704
		0.666	0.951			0.715	0.704
		0.666	0.963			0.715	0.704
		0.666	0.964			0.715	0.704
		0.666	0.969			0.715	0.704
		0.666	0.97			0.715	0.705
		0.666	0.974			0.715	0.705
		0.667	0.975			0.716	0.705
		0.667	0.979			0.716	0.705
		0.667	0.98			0.716	0.705
		0.668	0.98			0.716	0.705
		0.668	0.981			0.716	0.706
		0.668	0.984			0.716	0.706
		0.668	0.992			0.716	0.706
		0.668	1			0.717	0.706
		0.669	1.01			0.717	0.707
		0.669	1.01			0.717	0.707
		0.669	1.02			0.717	0.707
		0.669	1.02			0.718	0.707
		0.669	1.02			0.718	0.707
		0.669	1.03			0.718	0.707
		0.669	1.05			0.718	0.707
		0.669	1.05			0.719	0.707
		0.67	1.06			0.719	0.707
		0.67	1.07			0.719	0.709
		0.67	1.08			0.719	0.709
		0.67	1.09			0.719	0.709
		0.67	1.11			0.72	0.709
		0.67	1.11			0.72	0.709
		0.671	1.13			0.72	0.709
		0.671	1.14			0.721	0.709
		0.671	1.15			0.721	0.71
		0.671	1.15			0.721	0.71
		0.671	1.16			0.721	0.71
		0.671	1.18			0.722	0.71
		0.671	1.2			0.722	0.71
		0.672				0.722	0.711
		0.672				0.722	0.711
		0.672				0.722	0.711
		0.672				0.722	0.712
		0.672				0.722	0.712
		0.672				0.722	0.712
		0.672				0.722	0.712
		0.673				0.722	0.712
		0.673				0.722	0.712
		0.673				0.723	0.712
		0.673				0.723	0.712
		0.674				0.723	0.713
		0.674				0.723	0.713
		0.674				0.723	0.713
		0.674				0.723	0.713
		0.674				0.723	0.714
		0.674				0.723	0.714
		0.674				0.724	0.714
		0.674				0.724	0.714
		0.675				0.724	0.714
		0.676				0.725	0.714
		0.676				0.725	0.715
		0.676				0.725	0.715
		0.676				0.725	0.715
		0.676				0.725	0.715
		0.676				0.725	0.715
		0.676				0.726	0.716
		0.677				0.726	0.716
		0.677				0.726	0.716
		0.677				0.726	0.716
		0.677				0.726	0.716
		0.677				0.727	0.716
		0.677				0.727	0.717
		0.677				0.727	0.717
		0.677				0.727	0.717
		0.677				0.727	0.717
		0.678				0.728	0.717
		0.678				0.728	0.717
		0.678				0.728	0.717
		0.678				0.728	0.717
		0.678				0.729	0.717
		0.678				0.729	0.718
		0.678				0.729	0.718
		0.678				0.73	0.718
		0.679				0.73	0.718
		0.679				0.73	0.718
		0.679				0.73	0.718
		0.68				0.73	0.718
		0.68				0.731	0.718
		0.68				0.731	0.718
		0.68				0.731	0.719
		0.68				0.731	0.719
		0.68				0.731	0.719
		0.681				0.732	0.719
		0.681				0.732	0.719
		0.681				0.732	0.72
		0.682				0.732	0.72
		0.682				0.732	0.72
		0.682				0.732	0.72
		0.682				0.733	0.72
		0.683				0.733	0.721
		0.683				0.733	0.721
		0.683				0.733	0.721
		0.683				0.733	0.721
		0.683				0.733	0.722
		0.683				0.733	0.722
		0.683				0.733	0.722
		0.683				0.733	0.722
		0.683				0.733	0.723
		0.683				0.733	0.723
		0.683				0.734	0.723
		0.684				0.734	0.723
		0.684				0.734	0.723
		0.684				0.734	0.724
		0.684				0.734	0.724
		0.684				0.734	0.724
		0.684				0.735	0.725
		0.685				0.735	0.725
		0.685				0.735	0.725
		0.685				0.735	0.725
		0.685				0.735	0.725
		0.685				0.735	0.725
		0.685				0.736	0.725
		0.686				0.736	0.726
		0.686				0.737	0.726
		0.686				0.737	0.726
		0.686				0.737	0.726
		0.686				0.737	0.726
		0.686				0.737	0.726
		0.686				0.738	0.726
		0.687				0.738	0.726
		0.687				0.738	0.726
		0.687				0.738	0.727
		0.687				0.739	0.727
		0.687				0.739	0.727
		0.687				0.739	0.727
		0.687				0.739	0.728
		0.687				0.741	0.728
		0.688				0.741	0.728
		0.688				0.742	0.728
		0.688				0.742	0.728
		0.689				0.742	0.728
		0.689				0.742	0.729
		0.689				0.742	0.729
		0.689				0.742	0.729
		0.689				0.742	0.729
		0.689				0.742	0.729
		0.689				0.742	0.729
		0.69				0.743	0.73
		0.69				0.743	0.73
		0.69				0.743	0.731
		0.69				0.743	0.731
		0.69				0.744	0.731
		0.69				0.744	0.731
		0.691				0.744	0.731
		0.691				0.744	0.732
		0.691				0.744	0.732
		0.691				0.744	0.732
		0.691				0.744	0.732
		0.692				0.745	0.732
		0.692				0.745	0.732
		0.692				0.746	0.732
		0.692				0.746	0.732
		0.693				0.746	0.733
		0.693				0.746	0.734
		0.693				0.746	0.734
		0.693				0.746	0.734
		0.693				0.746	0.734
		0.693				0.746	0.734
		0.693				0.747	0.735
		0.694				0.747	0.735
		0.694				0.747	0.735
		0.694				0.747	0.735
		0.694				0.747	0.735
		0.694				0.747	0.735
		0.694				0.747	0.735
		0.694				0.747	0.735
		0.694				0.748	0.736
		0.694				0.748	0.736
		0.695				0.748	0.736
		0.695				0.748	0.736
		0.695				0.748	0.737
		0.695				0.748	0.737
		0.695				0.748	0.737
		0.695				0.749	0.737
		0.695				0.749	0.737
		0.696				0.749	0.737
		0.696				0.749	0.737
		0.696				0.749	0.738
		0.696				0.749	0.738
		0.696				0.749	0.738
		0.696				0.75	0.738
		0.696				0.75	0.738
		0.696				0.75	0.739
		0.696				0.75	0.739
		0.696				0.75	0.739
		0.697				0.75	0.739
		0.697				0.75	0.739
		0.697				0.75	0.739
		0.697				0.75	0.74
		0.697				0.75	0.74
		0.697				0.751	0.74
		0.698				0.751	0.74
		0.698				0.751	0.74
		0.698				0.751	0.74
		0.698				0.751	0.74
		0.698				0.751	0.74
		0.698				0.751	0.741
		0.699				0.751	0.741
		0.699				0.751	0.741
		0.699				0.751	0.741
		0.699				0.751	0.741
		0.7				0.752	0.743
		0.7				0.752	0.743
		0.7				0.752	0.743
		0.7				0.752	0.743
		0.7				0.752	0.743
		0.7				0.752	0.743
		0.7				0.753	0.743
		0.701				0.753	0.743
		0.701				0.753	0.743
		0.701				0.753	0.744
		0.701				0.753	0.744
		0.701				0.753	0.744
		0.701				0.753	0.744
		0.702				0.754	0.744
		0.702				0.754	0.744
		0.702				0.754	0.745
		0.702				0.754	0.745
		0.702				0.754	0.745
		0.702				0.755	0.745
		0.703				0.755	0.746
		0.703				0.755	0.746
		0.703				0.755	0.746
		0.703				0.755	0.746
		0.703				0.755	0.746
		0.704				0.755	0.747
		0.704				0.755	0.747
		0.704				0.756	0.747
		0.704				0.756	0.747
		0.704				0.756	0.747
		0.704				0.756	0.748
		0.704				0.756	0.748
		0.705				0.756	0.748
		0.705				0.756	0.748
		0.705				0.757	0.748
		0.705				0.757	0.748
		0.705				0.757	0.749
		0.705				0.757	0.749
		0.705				0.758	0.749
		0.705				0.758	0.749
		0.706				0.758	0.749
		0.706				0.759	0.75
		0.706				0.759	0.75
		0.706				0.759	0.75
		0.706				0.759	0.75
		0.706				0.759	0.751
		0.706				0.759	0.751
		0.706				0.759	0.751
		0.706				0.759	0.752
		0.706				0.759	0.752
		0.706				0.76	0.752
		0.707				0.761	0.752
		0.707				0.761	0.752
		0.707				0.761	0.752
		0.707				0.761	0.752
		0.707				0.761	0.752
		0.707				0.762	0.753
		0.707				0.762	0.753
		0.707				0.762	0.753
		0.708				0.762	0.753
		0.708				0.762	0.753
		0.708				0.762	0.753
		0.708				0.762	0.753
		0.708				0.762	0.753
		0.709				0.762	0.754
		0.709				0.762	0.754
		0.709				0.763	0.754
		0.709				0.763	0.755
		0.709				0.763	0.755
		0.709				0.763	0.756
		0.709				0.763	0.757
		0.709				0.763	0.757
		0.71				0.763	0.758
		0.71				0.763	0.758
		0.71				0.763	0.758
		0.71				0.763	0.758
		0.71				0.764	0.758
		0.71				0.764	0.758
		0.71				0.764	0.758
		0.711				0.764	0.758
		0.711				0.764	0.759
		0.711				0.764	0.759
		0.711				0.764	0.759
		0.711				0.764	0.76
		0.712				0.765	0.76
		0.712				0.765	0.76
		0.712				0.765	0.761
		0.712				0.765	0.761
		0.712				0.765	0.761
		0.712				0.766	0.761
		0.712				0.766	0.761
		0.712				0.766	0.761
		0.713				0.766	0.761
		0.713				0.767	0.762
		0.713				0.767	0.762
		0.713				0.767	0.762
		0.713				0.767	0.762
		0.713				0.767	0.762
		0.713				0.767	0.762
		0.714				0.767	0.763
		0.714				0.767	0.763
		0.714				0.767	0.764
		0.715				0.768	0.764
		0.715				0.768	0.764
		0.715				0.768	0.764
		0.715				0.768	0.765
		0.715				0.768	0.765
		0.715				0.768	0.765
		0.716				0.768	0.765
		0.716				0.768	0.765
		0.717				0.769	0.765
		0.717				0.769	0.765
		0.718				0.769	0.765
		0.718				0.769	0.766
		0.718				0.77	0.766
		0.718				0.77	0.766
		0.718				0.77	0.766
		0.719				0.77	0.766
		0.719				0.77	0.767
		0.72				0.77	0.767
		0.72				0.771	0.767
		0.72				0.771	0.767
		0.72				0.771	0.768
		0.72				0.771	0.768
		0.72				0.771	0.768
		0.72				0.771	0.768
		0.721				0.771	0.768
		0.721				0.771	0.768
		0.721				0.772	0.768
		0.721				0.772	0.768
		0.721				0.772	0.768
		0.721				0.772	0.768
		0.721				0.773	0.769
		0.721				0.773	0.769
		0.721				0.773	0.769
		0.722				0.773	0.769
		0.722				0.774	0.769
		0.722				0.774	0.769
		0.723				0.774	0.769
		0.723				0.774	0.769
		0.723				0.774	0.769
		0.723				0.775	0.769
		0.723				0.775	0.77
		0.724				0.775	0.77
		0.724				0.775	0.77
		0.724				0.776	0.77
		0.724				0.776	0.77
		0.724				0.776	0.771
		0.725				0.776	0.771
		0.725				0.776	0.771
		0.725				0.777	0.771
		0.726				0.777	0.771
		0.726				0.778	0.772
		0.726				0.778	0.772
		0.726				0.778	0.773
		0.726				0.779	0.773
		0.727				0.779	0.774
		0.727				0.779	0.774
		0.727				0.78	0.774
		0.727				0.78	0.774
		0.727				0.78	0.774
		0.727				0.781	0.775
		0.728				0.781	0.775
		0.728				0.781	0.775
		0.728				0.781	0.775
		0.728				0.782	0.775
		0.728				0.782	0.775
		0.728				0.783	0.776
		0.728				0.783	0.776
		0.728				0.783	0.776
		0.728				0.783	0.776
		0.728				0.783	0.776
		0.729				0.784	0.777
		0.729				0.784	0.777
		0.729				0.784	0.777
		0.729				0.784	0.777
		0.729				0.784	0.777
		0.729				0.784	0.778
		0.729				0.785	0.778
		0.73				0.785	0.778
		0.73				0.785	0.778
		0.73				0.785	0.779
		0.73				0.785	0.779
		0.73				0.786	0.779
		0.73				0.786	0.779
		0.73				0.786	0.78
		0.73				0.786	0.78
		0.73				0.787	0.78
		0.731				0.787	0.78
		0.731				0.787	0.78
		0.731				0.787	0.78
		0.731				0.787	0.78
		0.731				0.787	0.78
		0.731				0.788	0.78
		0.732				0.788	0.781
		0.732				0.788	0.781
		0.732				0.788	0.781
		0.732				0.788	0.781
		0.733				0.788	0.781
		0.733				0.788	0.781
		0.733				0.788	0.781
		0.733				0.788	0.781
		0.733				0.788	0.781
		0.733				0.788	0.782
		0.733				0.788	0.782
		0.733				0.789	0.782
		0.733				0.789	0.783
		0.733				0.789	0.783
		0.734				0.789	0.783
		0.734				0.789	0.783
		0.734				0.789	0.783
		0.734				0.79	0.783
		0.734				0.79	0.783
		0.734				0.79	0.783
		0.735				0.79	0.784
		0.735				0.79	0.785
		0.735				0.79	0.785
		0.735				0.79	0.785
		0.735				0.79	0.785
		0.735				0.79	0.785
		0.735				0.791	0.785
		0.735				0.791	0.785
		0.735				0.791	0.785
		0.735				0.791	0.786
		0.736				0.791	0.786
		0.736				0.792	0.786
		0.736				0.792	0.786
		0.736				0.792	0.787
		0.736				0.792	0.787
		0.736				0.792	0.787
		0.736				0.793	0.788
		0.736				0.793	0.788
		0.736				0.794	0.788
		0.737				0.794	0.788
		0.737				0.794	0.788
		0.737				0.795	0.788
		0.737				0.795	0.788
		0.737				0.795	0.789
		0.737				0.795	0.789
		0.737				0.795	0.789
		0.737				0.795	0.79
		0.738				0.795	0.79
		0.738				0.795	0.79
		0.738				0.796	0.79
		0.738				0.796	0.79
		0.739				0.797	0.79
		0.739				0.797	0.79
		0.739				0.798	0.791
		0.739				0.798	0.791
		0.739				0.798	0.791
		0.739				0.798	0.791
		0.74				0.798	0.791
		0.74				0.798	0.791
		0.74				0.799	0.791
		0.74				0.799	0.791
		0.741				0.799	0.792
		0.741				0.799	0.792
		0.741				0.799	0.792
		0.741				0.799	0.792
		0.741				0.8	0.793
		0.741				0.8	0.793
		0.742				0.8	0.793
		0.742				0.801	0.793
		0.742				0.801	0.793
		0.742				0.801	0.794
		0.742				0.801	0.794
		0.742				0.802	0.794
		0.742				0.802	0.794
		0.743				0.802	0.794
		0.743				0.802	0.794
		0.743				0.802	0.795
		0.743				0.802	0.795
		0.743				0.802	0.795
		0.743				0.803	0.795
		0.743				0.803	0.796
		0.743				0.803	0.796
		0.744				0.803	0.796
		0.744				0.804	0.796
		0.744				0.804	0.797
		0.744				0.804	0.797
		0.744				0.804	0.797
		0.745				0.804	0.797
		0.745				0.805	0.797
		0.745				0.805	0.797
		0.745				0.805	0.798
		0.745				0.805	0.798
		0.745				0.806	0.798
		0.745				0.806	0.798
		0.745				0.806	0.799
		0.746				0.807	0.799
		0.746				0.807	0.799
		0.746				0.807	0.799
		0.747				0.807	0.799
		0.747				0.808	0.799
		0.747				0.808	0.799
		0.747				0.808	0.799
		0.747				0.809	0.8
		0.747				0.809	0.8
		0.748				0.809	0.8
		0.748				0.809	0.8
		0.748				0.809	0.8
		0.748				0.809	0.8
		0.749				0.809	0.801
		0.749				0.809	0.801
		0.749				0.809	0.801
		0.749				0.81	0.801
		0.749				0.81	0.801
		0.749				0.81	0.801
		0.749				0.81	0.802
		0.749				0.81	0.802
		0.75				0.81	0.802
		0.75				0.81	0.802
		0.75				0.81	0.802
		0.75				0.81	0.803
		0.75				0.811	0.803
		0.75				0.811	0.803
		0.751				0.812	0.803
		0.751				0.812	0.803
		0.751				0.812	0.803
		0.752				0.812	0.803
		0.752				0.812	0.803
		0.752				0.812	0.803
		0.752				0.813	0.804
		0.752				0.813	0.804
		0.753				0.813	0.804
		0.753				0.813	0.804
		0.753				0.814	0.805
		0.753				0.814	0.805
		0.753				0.814	0.805
		0.753				0.814	0.805
		0.753				0.814	0.805
		0.754				0.814	0.805
		0.754				0.814	0.805
		0.754				0.814	0.805
		0.754				0.814	0.806
		0.754				0.814	0.806
		0.754				0.815	0.806
		0.754				0.815	0.806
		0.754				0.815	0.807
		0.755				0.815	0.807
		0.755				0.815	0.807
		0.755				0.815	0.808
		0.755				0.815	0.808
		0.755				0.816	0.808
		0.755				0.816	0.809
		0.755				0.816	0.809
		0.756				0.816	0.809
		0.756				0.816	0.809
		0.756				0.816	0.809
		0.756				0.816	0.81
		0.757				0.816	0.81
		0.757				0.816	0.811
		0.757				0.817	0.811
		0.757				0.817	0.812
		0.757				0.817	0.812
		0.758				0.817	0.812
		0.758				0.817	0.812
		0.758				0.818	0.812
		0.759				0.818	0.813
		0.759				0.818	0.813
		0.759				0.818	0.813
		0.759				0.818	0.813
		0.759				0.819	0.813
		0.759				0.819	0.813
		0.759				0.819	0.813
		0.76				0.82	0.813
		0.76				0.82	0.814
		0.76				0.82	0.814
		0.76				0.821	0.814
		0.76				0.821	0.814
		0.76				0.821	0.815
		0.76				0.821	0.815
		0.76				0.821	0.815
		0.761				0.822	0.815
		0.761				0.822	0.815
		0.761				0.822	0.815
		0.761				0.822	0.816
		0.761				0.822	0.816
		0.761				0.823	0.816
		0.762				0.823	0.816
		0.762				0.823	0.817
		0.762				0.823	0.817
		0.762				0.824	0.817
		0.763				0.824	0.817
		0.763				0.824	0.817
		0.763				0.825	0.817
		0.763				0.825	0.817
		0.763				0.825	0.818
		0.763				0.825	0.818
		0.763				0.826	0.818
		0.763				0.826	0.818
		0.763				0.826	0.818
		0.763				0.826	0.818
		0.763				0.826	0.819
		0.764				0.827	0.819
		0.764				0.828	0.819
		0.764				0.828	0.819
		0.764				0.829	0.819
		0.765				0.829	0.819
		0.765				0.829	0.819
		0.765				0.829	0.819
		0.765				0.829	0.82
		0.765				0.83	0.82
		0.765				0.83	0.82
		0.765				0.83	0.82
		0.766				0.83	0.82
		0.766				0.831	0.82
		0.766				0.831	0.82
		0.767				0.831	0.82
		0.767				0.831	0.82
		0.767				0.831	0.82
		0.767				0.831	0.821
		0.767				0.831	0.821
		0.767				0.832	0.821
		0.767				0.832	0.821
		0.768				0.832	0.821
		0.768				0.832	0.822
		0.769				0.832	0.822
		0.769				0.832	0.823
		0.769				0.833	0.823
		0.769				0.833	0.824
		0.769				0.834	0.824
		0.769				0.834	0.824
		0.769				0.834	0.824
		0.769				0.834	0.824
		0.769				0.834	0.824
		0.77				0.835	0.825
		0.77				0.835	0.825
		0.77				0.836	0.825
		0.77				0.836	0.825
		0.77				0.836	0.825
		0.77				0.837	0.826
		0.77				0.837	0.826
		0.771				0.837	0.826
		0.771				0.838	0.826
		0.771				0.838	0.827
		0.771				0.838	0.827
		0.771				0.838	0.827
		0.772				0.838	0.827
		0.772				0.839	0.827
		0.772				0.839	0.827
		0.772				0.839	0.827
		0.772				0.839	0.827
		0.772				0.839	0.827
		0.773				0.84	0.828
		0.773				0.84	0.828
		0.773				0.84	0.828
		0.773				0.841	0.828
		0.773				0.841	0.828
		0.773				0.842	0.829
		0.773				0.843	0.829
		0.774				0.843	0.829
		0.774				0.843	0.829
		0.775				0.843	0.829
		0.775				0.843	0.829
		0.775				0.844	0.83
		0.775				0.844	0.83
		0.776				0.845	0.83
		0.776				0.845	0.83
		0.776				0.845	0.83
		0.776				0.846	0.83
		0.776				0.846	0.83
		0.776				0.846	0.83
		0.777				0.846	0.83
		0.777				0.846	0.83
		0.777				0.846	0.831
		0.777				0.846	0.831
		0.777				0.847	0.831
		0.777				0.847	0.831
		0.777				0.847	0.832
		0.777				0.847	0.832
		0.778				0.847	0.832
		0.778				0.847	0.832
		0.778				0.848	0.832
		0.778				0.848	0.832
		0.778				0.848	0.832
		0.778				0.848	0.833
		0.779				0.848	0.833
		0.779				0.848	0.833
		0.779				0.849	0.833
		0.779				0.849	0.834
		0.779				0.849	0.834
		0.779				0.849	0.834
		0.779				0.85	0.834
		0.78				0.85	0.834
		0.78				0.85	0.834
		0.78				0.85	0.835
		0.781				0.85	0.835
		0.781				0.85	0.835
		0.781				0.85	0.835
		0.781				0.851	0.835
		0.781				0.851	0.835
		0.782				0.851	0.835
		0.782				0.851	0.835
		0.782				0.852	0.835
		0.783				0.852	0.835
		0.783				0.852	0.835
		0.783				0.852	0.836
		0.783				0.852	0.836
		0.784				0.852	0.836
		0.785				0.853	0.836
		0.785				0.853	0.837
		0.785				0.854	0.837
		0.785				0.854	0.837
		0.785				0.854	0.838
		0.786				0.854	0.838
		0.786				0.854	0.838
		0.786				0.854	0.838
		0.786				0.854	0.838
		0.787				0.855	0.838
		0.787				0.855	0.838
		0.788				0.855	0.838
		0.788				0.855	0.839
		0.789				0.855	0.839
		0.789				0.855	0.839
		0.789				0.855	0.839
		0.789				0.856	0.839
		0.789				0.857	0.839
		0.79				0.857	0.839
		0.79				0.857	0.84
		0.79				0.857	0.84
		0.791				0.857	0.84
		0.791				0.858	0.84
		0.791				0.858	0.84
		0.791				0.858	0.84
		0.791				0.859	0.84
		0.792				0.859	0.84
		0.792				0.859	0.84
		0.792				0.859	0.841
		0.793				0.86	0.841
		0.793				0.86	0.841
		0.793				0.86	0.841
		0.794				0.861	0.841
		0.794				0.861	0.842
		0.794				0.861	0.842
		0.795				0.861	0.842
		0.795				0.861	0.843
		0.795				0.862	0.843
		0.795				0.862	0.843
		0.795				0.862	0.843
		0.795				0.863	0.843
		0.796				0.863	0.844
		0.796				0.863	0.844
		0.796				0.863	0.844
		0.797				0.863	0.845
		0.797				0.864	0.845
		0.797				0.864	0.845
		0.797				0.864	0.845
		0.798				0.864	0.845
		0.798				0.864	0.845
		0.798				0.864	0.846
		0.798				0.865	0.846
		0.799				0.865	0.846
		0.799				0.865	0.846
		0.799				0.865	0.846
		0.799				0.865	0.847
		0.8				0.865	0.847
		0.8				0.865	0.847
		0.8				0.866	0.847
		0.8				0.866	0.847
		0.8				0.866	0.848
		0.801				0.866	0.848
		0.801				0.866	0.848
		0.801				0.866	0.848
		0.802				0.868	0.849
		0.802				0.868	0.85
		0.802				0.868	0.85
		0.802				0.868	0.85
		0.802				0.868	0.85
		0.802				0.868	0.851
		0.803				0.869	0.851
		0.803				0.869	0.851
		0.803				0.869	0.851
		0.803				0.87	0.852
		0.803				0.87	0.852
		0.803				0.87	0.852
		0.804				0.87	0.853
		0.804				0.87	0.853
		0.804				0.871	0.853
		0.804				0.871	0.854
		0.804				0.871	0.854
		0.804				0.871	0.854
		0.805				0.871	0.855
		0.805				0.872	0.855
		0.805				0.872	0.855
		0.805				0.872	0.855
		0.805				0.873	0.856
		0.805				0.873	0.856
		0.805				0.873	0.856
		0.806				0.873	0.856
		0.806				0.874	0.856
		0.806				0.874	0.857
		0.806				0.875	0.857
		0.806				0.875	0.857
		0.807				0.875	0.857
		0.807				0.875	0.858
		0.807				0.875	0.858
		0.807				0.875	0.858
		0.807				0.875	0.858
		0.807				0.876	0.858
		0.807				0.876	0.858
		0.808				0.877	0.859
		0.808				0.877	0.859
		0.809				0.877	0.859
		0.809				0.878	0.859
		0.809				0.879	0.859
		0.81				0.879	0.86
		0.81				0.879	0.86
		0.81				0.879	0.86
		0.81				0.88	0.861
		0.81				0.88	0.861
		0.81				0.88	0.861
		0.81				0.88	0.861
		0.811				0.88	0.862
		0.811				0.881	0.862
		0.811				0.881	0.862
		0.811				0.881	0.863
		0.811				0.881	0.863
		0.811				0.882	0.863
		0.812				0.882	0.863
		0.812				0.882	0.863
		0.812				0.883	0.863
		0.812				0.883	0.864
		0.812				0.884	0.864
		0.812				0.884	0.864
		0.813				0.885	0.864
		0.813				0.885	0.864
		0.813				0.885	0.864
		0.813				0.886	0.865
		0.814				0.886	0.866
		0.814				0.886	0.866
		0.814				0.886	0.866
		0.815				0.886	0.866
		0.815				0.886	0.866
		0.815				0.886	0.866
		0.815				0.887	0.867
		0.815				0.887	0.867
		0.816				0.887	0.868
		0.816				0.887	0.868
		0.816				0.887	0.868
		0.816				0.887	0.868
		0.817				0.888	0.868
		0.817				0.888	0.868
		0.817				0.888	0.869
		0.817				0.888	0.869
		0.817				0.889	0.87
		0.818				0.889	0.87
		0.818				0.889	0.87
		0.818				0.889	0.871
		0.819				0.889	0.872
		0.819				0.89	0.872
		0.819				0.89	0.872
		0.819				0.89	0.873
		0.82				0.89	0.874
		0.82				0.89	0.874
		0.82				0.891	0.874
		0.82				0.891	0.874
		0.821				0.891	0.875
		0.821				0.891	0.875
		0.821				0.892	0.875
		0.821				0.892	0.875
		0.822				0.892	0.875
		0.822				0.892	0.876
		0.822				0.893	0.876
		0.822				0.894	0.876
		0.822				0.894	0.876
		0.822				0.894	0.876
		0.822				0.894	0.876
		0.823				0.894	0.877
		0.823				0.894	0.877
		0.823				0.894	0.878
		0.823				0.895	0.878
		0.823				0.896	0.878
		0.823				0.896	0.878
		0.823				0.896	0.879
		0.823				0.897	0.879
		0.823				0.897	0.879
		0.824				0.897	0.879
		0.824				0.897	0.88
		0.825				0.897	0.88
		0.825				0.897	0.88
		0.825				0.897	0.88
		0.825				0.897	0.88
		0.825				0.898	0.881
		0.826				0.898	0.881
		0.826				0.898	0.882
		0.826				0.898	0.882
		0.826				0.898	0.883
		0.826				0.898	0.883
		0.827				0.898	0.883
		0.828				0.898	0.883
		0.828				0.899	0.884
		0.828				0.899	0.884
		0.829				0.899	0.884
		0.829				0.899	0.885
		0.829				0.9	0.885
		0.829				0.9	0.886
		0.83				0.901	0.886
		0.83				0.901	0.886
		0.83				0.902	0.887
		0.83				0.902	0.887
		0.831				0.903	0.887
		0.831				0.903	0.887
		0.831				0.903	0.887
		0.832				0.904	0.887
		0.832				0.905	0.887
		0.832				0.905	0.887
		0.833				0.905	0.888
		0.833				0.905	0.888
		0.833				0.905	0.888
		0.833				0.905	0.889
		0.834				0.906	0.889
		0.834				0.906	0.889
		0.834				0.906	0.889
		0.834				0.906	0.89
		0.834				0.906	0.891
		0.835				0.906	0.891
		0.835				0.907	0.892
		0.835				0.907	0.892
		0.836				0.907	0.892
		0.836				0.908	0.893
		0.836				0.908	0.893
		0.837				0.908	0.893
		0.837				0.908	0.893
		0.837				0.908	0.894
		0.837				0.908	0.894
		0.837				0.908	0.894
		0.837				0.909	0.894
		0.838				0.909	0.895
		0.838				0.909	0.895
		0.838				0.909	0.896
		0.838				0.909	0.897
		0.838				0.91	0.897
		0.839				0.91	0.897
		0.84				0.91	0.897
		0.84				0.911	0.899
		0.84				0.911	0.899
		0.84				0.911	0.899
		0.841				0.911	0.899
		0.841				0.911	0.9
		0.842				0.912	0.9
		0.843				0.912	0.9
		0.843				0.913	0.9
		0.843				0.913	0.9
		0.843				0.913	0.9
		0.843				0.914	0.901
		0.845				0.914	0.901
		0.845				0.914	0.901
		0.845				0.915	0.901
		0.845				0.915	0.902
		0.845				0.915	0.902
		0.845				0.915	0.902
		0.845				0.916	0.902
		0.845				0.916	0.902
		0.846				0.916	0.903
		0.846				0.917	0.903
		0.846				0.917	0.903
		0.846				0.917	0.903
		0.847				0.918	0.904
		0.847				0.918	0.904
		0.847				0.918	0.904
		0.847				0.918	0.904
		0.848				0.919	0.904
		0.848				0.919	0.904
		0.849				0.919	0.905
		0.85				0.919	0.905
		0.85				0.92	0.905
		0.85				0.92	0.905
		0.85				0.92	0.905
		0.851				0.921	0.906
		0.851				0.922	0.906
		0.851				0.922	0.907
		0.851				0.922	0.907
		0.851				0.922	0.907
		0.851				0.922	0.907
		0.851				0.922	0.907
		0.852				0.923	0.907
		0.852				0.923	0.909
		0.852				0.923	0.909
		0.852				0.924	0.909
		0.852				0.925	0.909
		0.853				0.925	0.91
		0.854				0.926	0.91
		0.854				0.926	0.91
		0.854				0.926	0.91
		0.854				0.926	0.91
		0.854				0.927	0.911
		0.855				0.927	0.912
		0.855				0.927	0.912
		0.856				0.927	0.913
		0.856				0.927	0.913
		0.857				0.927	0.913
		0.857				0.928	0.914
		0.857				0.928	0.915
		0.858				0.928	0.915
		0.859				0.929	0.915
		0.859				0.929	0.916
		0.859				0.93	0.916
		0.859				0.93	0.916
		0.859				0.93	0.917
		0.86				0.93	0.917
		0.86				0.931	0.917
		0.86				0.931	0.917
		0.86				0.932	0.917
		0.86				0.932	0.918
		0.861				0.932	0.918
		0.861				0.933	0.918
		0.861				0.933	0.919
		0.862				0.934	0.919
		0.862				0.934	0.919
		0.862				0.934	0.919
		0.863				0.935	0.92
		0.863				0.935	0.92
		0.864				0.935	0.92
		0.864				0.935	0.921
		0.864				0.935	0.921
		0.864				0.936	0.922
		0.865				0.936	0.922
		0.866				0.936	0.923
		0.867				0.937	0.923
		0.867				0.937	0.924
		0.867				0.937	0.924
		0.868				0.937	0.924
		0.868				0.937	0.924
		0.869				0.938	0.925
		0.869				0.939	0.925
		0.869				0.94	0.925
		0.87				0.94	0.925
		0.871				0.94	0.926
		0.872				0.94	0.928
		0.872				0.941	0.928
		0.872				0.941	0.929
		0.872				0.941	0.929
		0.873				0.941	0.929
		0.873				0.942	0.93
		0.874				0.943	0.93
		0.874				0.943	0.931
		0.874				0.943	0.931
[truncated: 578 more rows]
